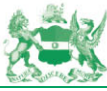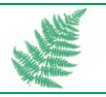

## Island life – classification, speciation and cryptic species of *Pycnandra* (Sapotaceae) in New Caledonia

ULF SWENSON<sup>1\*</sup>, JÉRÔME MUNZINGER<sup>2</sup>, PORTER P. LOWRY II<sup>3,4</sup>,  
BODIL CRONHOLM<sup>5</sup> and STEPHAN NYLINDER<sup>1</sup>

<sup>1</sup>*Department of Botany, Swedish Museum of Natural History, Box 50007, 10405 Stockholm, Sweden*

<sup>2</sup>*IRD, UMR AMAP, Montpellier, 34000 France*

<sup>3</sup>*Missouri Botanical Garden, PO Box 299, St Louis, MO 63166-0299, USA*

<sup>4</sup>*Institut de Systématique, Évolution, Biodiversité (ISYEB), UMR 7205 – CNRS, MNHN, UPMC, EPHE, Muséum National d'Histoire Naturelle, Sorbonne Universités, CP 39, 57 rue Cuvier, 75231 Paris CEDEX 05, France*

<sup>5</sup>*Department of Bioinformatics and Genetics, Swedish Museum of Natural History, Box 50007, 10405 Stockholm, Sweden*

Received 25 February 2015; revised 12 May 2015; accepted for publication 31 May 2015

*Pycnandra* (Sapotaceae), the largest endemic genus in New Caledonia, comprises 66 species classified in six subgenera. We tested phylogenetic relationships and a proposed infrageneric classification by sampling 60 species for sequences of nuclear ribosomal DNA (ETS, ITS, *RPB2*) and plastid DNA (*trnH-psbA*) and nine morphological characters. Data were analysed with Bayesian inference, parsimony jackknifing and lineage through time. We recovered a phylogenetic tree supporting the recognition of six proposed subgenera (*Achradotypus*, *Leptostylis*, *Pycnandra*, *Sebertia*, *Trouettia* and *Wagapensia*). Because a subgeneric classification is used, the nomenclature will be stable when the members are transferred to *Pycnandra*. Morphological traits were optimized in the BEAST analysis, adding evidence to earlier work that morphology has limited value for successfully diagnosing groups in Sapotaceae. We confirm a previously suspected case of cryptic species that exhibit the same morphological features and require the same abiotic conditions, but are distantly related in the phylogenetic tree. We detected two possible new cases of cryptic sibling species that might warrant recognition. A slowdown in speciation rate in several genera has been suggested as evidence that New Caledonia was once submerged after rifting from Australia. Plotting lineages through time reveals two important intervals at 7.5–8.6 Ma and present to 1.5 Ma, when net molecular diversification within the genus was zero. This indicates that the genus presently has reached a dynamic equilibrium, providing additional evidence that New Caledonia is an old Darwinian island, being submerged during the Eocene and colonized after re-emergence c. 37 Ma. © 2015 The Linnean Society of London, *Botanical Journal of the Linnean Society*, 2015, **179**, 57–77.

ADDITIONAL KEYWORDS: anagenesis – Chrysophylloideae – morphology – phylogeny.

### INTRODUCTION

The archipelago of New Caledonia, a renowned hotspot for biodiversity (Myers *et al.*, 2000; Lowry *et al.*, 2004), is located c. 1500 km east of Queensland, Australia, in the south-western Pacific Ocean. It occupies an area of 19 060 km<sup>2</sup>, with Grande Terre being the largest island

covering some 16 595 km<sup>2</sup> (Neill & Trewick, 2008). Most of New Caledonia (with the exception of the geologically recent Loyalty Islands) is of continental origin, having rifted away from Australia 65–80 Mya, reaching its present position some 50 Mya, at which time it was entirely submerged (McLoughlin, 2001; Hall, 2002; Neill & Trewick, 2008). Before its re-emerged c. 37 Mya (Grandcolas *et al.*, 2008), the basement of New Caledonia was overthrust by lithospheric ultramafic rocks rich in nickel and cobalt

\*Corresponding author. E-mail: ulf.swenson@nrm.se

(Cluzel, Aitchison & Picard, 2001; Cluzel *et al.*, 2012), which gave rise to the mineral-rich substrates that are extensively exploited today, primarily for nickel. Most mining is done by scraping off mountain tops, where the best quality ore is concentrated, a process that removes the entire vegetation. This represents an acute threat to the biodiversity of the island, especially given the limited area that is under full protection (Jaffré, Bouchet & Veillon, 1998; Jaffré, 2005; Pascal *et al.*, 2008).

The known vascular flora of New Caledonia comprises 3371 species, of which 74.7% are endemic (Morat *et al.*, 2012). Sapotaceae are the third largest family with *c.* 135 species and *Pycnanandra* Benth. is the largest endemic genus in the archipelago with 66 species (some of which remain to be described). Species currently placed in *Pycnanandra* were previously assigned to seven genera by Aubréville (1967) and three by Pennington (1991), but both classifications have been shown to be unnatural as they do not reflect phylogenetic relationships and more recent studies have had difficulty delimiting genera that are both monophyletic and morphologically coherent (Bartish *et al.*, 2005; Swenson, Bartish & Munzinger, 2007a; Swenson *et al.*, 2008a). Based on unpublished nuclear ribosomal (nr) DNA sequence data, Swenson & Munzinger (2009) adopted a broader circumscription of *Pycnanandra* including all 66 currently known species and they provided an interim key to six subgenera using nearly a dozen morphological characters that exhibited limited homoplasy. Subsequently, revisions using a morphological species concept were published of subgenera *Pycnanandra*, *Achradotypus* (Baill.) Swenson & Munzinger, *Trouettia* (Pierre ex Baill.) Swenson & Munzinger and *Sebertia* (Pierre ex Engl.) Swenson & Munzinger (Swenson & Munzinger, 2009, 2010a, b, c) and treatments of subgenera *Leptostylis* ined and *Wagapensia* ined are submitted elsewhere for publication. The most complete phylogenetic studies conducted to date have analysed 38 and 44 species, respectively, using combined data for plastid and nrDNA (Swenson *et al.*, 2008a) or just nrDNA sequences (Swenson, Nylinder & Munzinger, 2013), with moderate success resolving deep nodes and reasonable success resolving terminal nodes. Phylogenetic relationships among the subgenera, the placement of *c.* 20 species and the diagnostic power of the morphological characters, however, remain to be tested.

Cryptic species have become an issue in recent years as identified, for example, in earthworms (James *et al.*, 2010), birds (Alström *et al.*, 2011) and geckos (Nielsen *et al.*, 2011). Cryptic species are recognized when the members of two or more distinct lineages are morphologically indistinguishable and can be detected only by other features such as differences in behaviour (differ-

ences in songs or mating calls in animals), host/parasite relationships (such as in figs and their associated fig wasps) or in molecular sequence data (Bickford *et al.*, 2007). Some authors stipulate that cryptic species should be recently diverged, separable only by molecular data, occur in sympatry or be reproductively isolated (Stebbins, 1950), features we do not regard as essential for being termed cryptic species. Detecting the presence of cryptic species has implications for classification, conservation and biogeography. In New Caledonia, only two cases of cryptic flowering plant species have been revealed, in *Spiraeanthemum* A.Gray (Cunoniaceae; Pillon *et al.*, 2009) and *Diospyros* L. (Ebenaceae; Turner *et al.*, 2013a). However, based on unpublished molecular data, Swenson & Munzinger (2010b) indicated that cryptic species might be present in *Pycnanandra*. The two shrubby taxa now placed in *Pycnanandra* but originally described as *Chrysophyllum lissophyllum* Pierre ex Baill. (Fig. 1A) and *C. lissophyllum* f. *obscurinervum* Vink (Fig. 1B) are morphologically highly similar but genetically dissimilar. The second of these taxa was originally recognized on the basis of obscure leaf vein characters (Vink, 1958), but was subsequently treated as a synonym of the former by Aubréville (1967) and was more recently recognized as the distinct species *P. obscurinerva* (Vink) Swenson & Munzinger (Swenson & Munzinger, 2010b). The morphology of these two entities is in fact so similar that the most practical way to distinguish them is by their geographical distributions: *P. lissophyllum* occurs on the large ultramafic plain of southern Grande Terre whereas *P. obscurinerva* grows on the ultramafic mountains along the north-western coast of the island (Swenson & Munzinger, 2010b, fig. 15B). This case of possible cryptic species remains, however, to be tested in a phylogenetic framework.

Several other systematic problems have been identified in *Pycnanandra* that likewise deserve attention. For instance, a molecular analysis including four accessions of *P. fastuosa* Vink indicated that the species might not be monophyletic (Swenson *et al.*, 2008a). *Pycnanandra fastuosa*, as currently circumscribed, forms canopy trees up to 35 m tall and is distributed from the southern tip of Grande Terre to the Koniambo massif in the north-west, always occurring on ultramafic substrate (Swenson & Munzinger, 2010b). Examination of herbarium material coupled with field observations suggests that this species could comprise two distinct taxa that differ on the basis of the density of secondary veins and the colour of the lower leaf blade. The majority of specimens have rather close secondary venation and a brownish shade on the lower leaf surface (Fig. 1C), whereas the remainder have a more open venation with a copper-shaded blade (Fig. 1D). For practical reasons, we refer

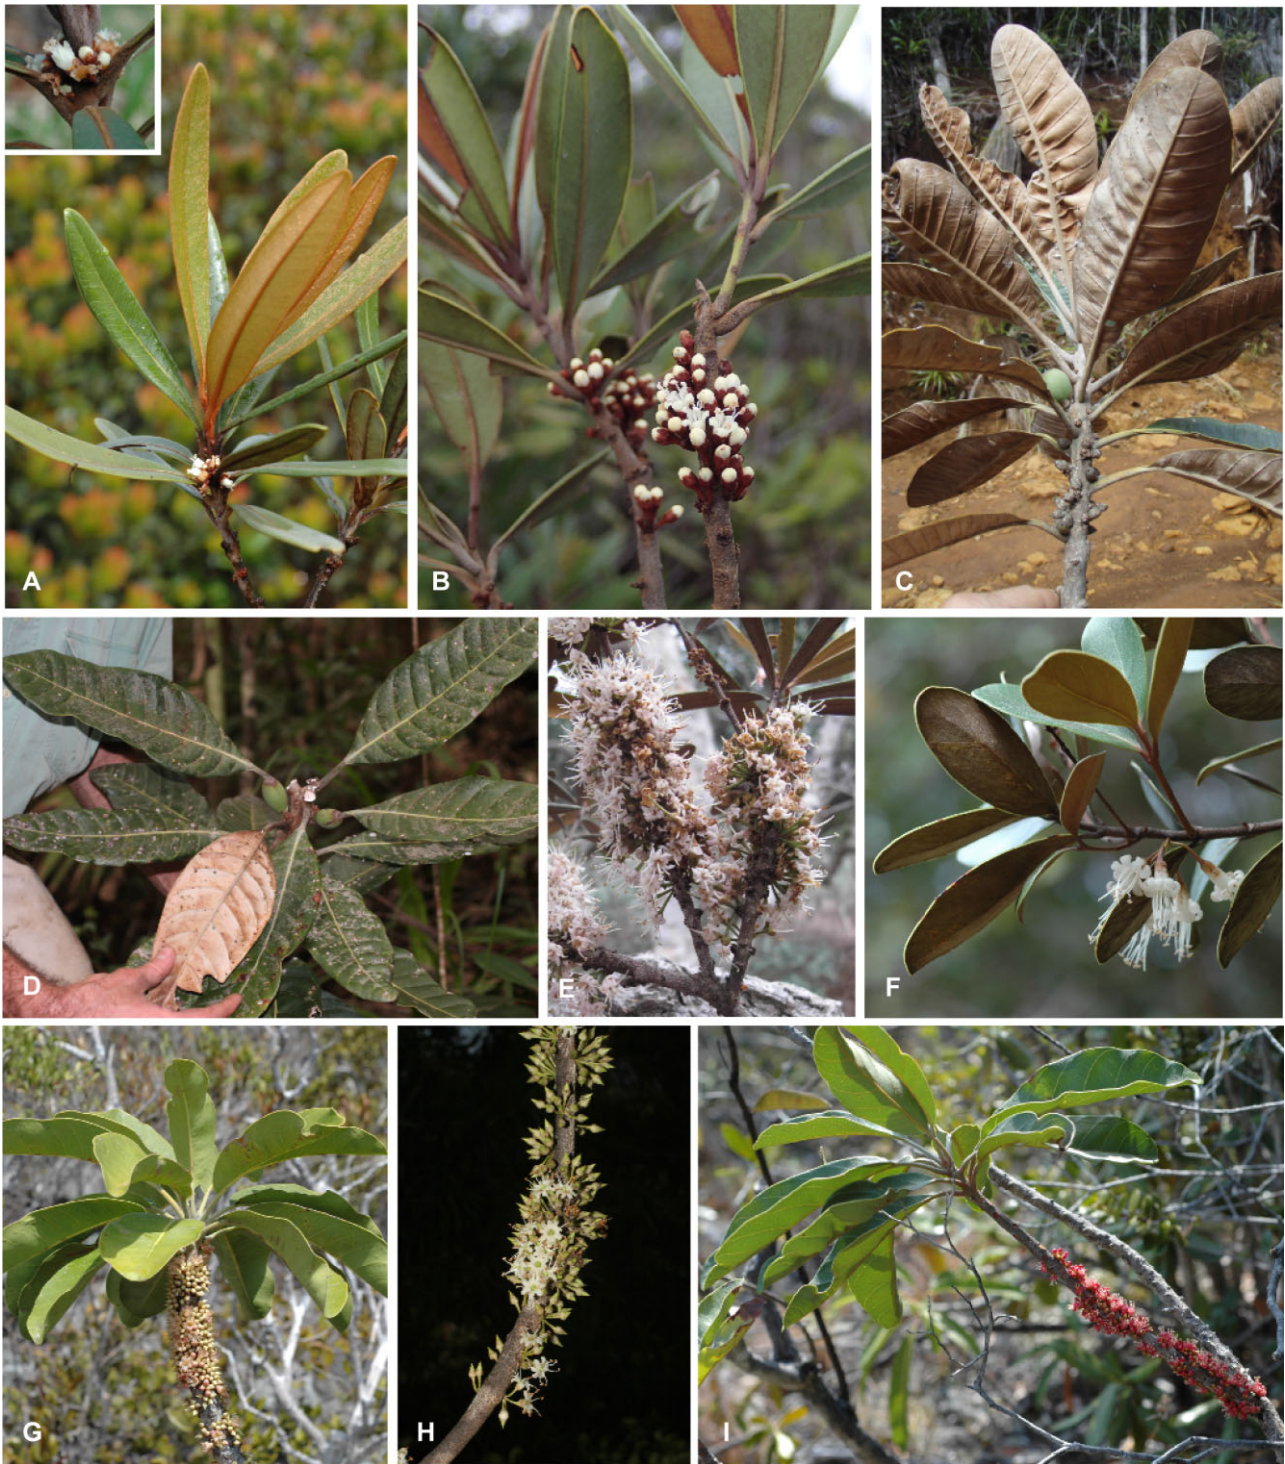

**Figure 1.** Selected images of members of the New Caledonian endemic genus *Pycnandra* (Sapotaceae). A, *P. lissophylla*. B, *P. obscurinerva*. C, *P. fastuosa*, the closed-veined type. D, *P. fastuosa*, the open-veined type. E, *P. Veillon8117*. F, *Leptostylis goroensis*. G, *P. kaalaensis*. H, *P. gordoniiifolia*. I, *P. blanchonii*. Photos: A, F, I by Jérôme Munzinger; B, C, D, G, H by Ulf Swenson; E by Gildas Gâteblé.

to these as the ‘close-veined’ and the ‘open-veined’ types. There is not, however, a clear-cut difference between these two types and intermediate specimens can be found. Possible differences in floral morphology cannot yet be assessed as flowers are poorly known in the closed-veined type. Moreover, the two types are sympatric in the southern part of the distribution of the species, although the closed-veined type is restricted to the extreme south of the main island (its northern location is Rivière Bleue reserve) and below 550 m, whereas the open-veined type is found from Forêt Nord in the far south to Koniambo in the north-west, and up to 1500 m. Hence, it is not clear whether *P. fastuosa* represents another example of cryptic species, incipient species, introgression or just morphological variation in a single species.

*Pycnandra* is almost entirely restricted to Grande Terre, with two species also present in the Belep Islands to the north of Grande Terre. However, in December 2013, material clearly belonging to the genus was collected by Jean-François Butaud for the first time on the low-lying calcareous island Ouvéa (Loyalty Islands) to the east of Grande Terre. The phylogenetic relationships of this material are unknown and it may represent a novel species.

The geological and biogeographical history of New Caledonia has long interested systematists, ecologists and evolutionary biologists. Grandcolas *et al.* (2008) drew attention to the idea that New Caledonia might best be regarded as an oceanic island rather than a continental fragment, as has long been held, pointing to geological evidence that strongly suggests a long-term submersion during the Palaeocene and Eocene prior to re-emergence *c.* 37 Mya (Paris, 1981; Cluzel *et al.*, 2001, 2012; Hall, 2002; Pelletier, 2006). If this interpretation is correct, then the New Caledonian biota in its entirety must have originated from elements that reached the island by dispersal, not through vicariance, which has long been regarded as the case (e.g. Raven & Axelrod, 1972; Heads, 2008, 2010). Phylogenetic studies that have included divergence time estimates, reviewed by Pillon (2012) and Cruaud *et al.* (2012), have consistently indicated dispersal to the archipelago after 37 Mya, a scenario also supported by work on Sapotaceae (Swenson, Nylinder & Munzinger, 2014). Apart from dating analyses, it is also possible to test whether an area has been saturated with species over a long period (consistent with vicariance resulting from persistent dry land) or became available for colonization at a particular point in time (consistent with emergence and subsequent dispersal) by comparing speciation and extinction rates across time in the framework of the ‘museum’ and ‘recolonization’ models (Gaston & Blackburn, 1996; Espeland & Muriénne, 2011). The museum model predicts constant speciation and an equal rate

of extinction that should lead to zero change in the number of species over time whereas the colonization model, which is density-dependent, predicts a reduction in the rate of diversification over time as niches become full. Espeland & Muriénne (2011) found strong evidence for a slowdown in diversification in eight out of the nine phylogenetic analyses they examined, one of which was *Pycnandra* (referred to as *Niemeyera* F.Muell. at the time), although only 47 of 66 currently recognized *Pycnandra* spp. were included in their analysis.

The primary goal of the present study is to estimate the phylogeny of *Pycnandra*, to test the subgeneric circumscription proposed by Swenson & Munzinger (2009) and to test the diagnostic value of the morphological characters they used to distinguish the subgenera. For this, we have assembled an almost complete taxon sample (62 out of 68 known taxa) and obtained sequence data for nrDNA (ETS, ITS, *RPB2*) and plastid DNA (*trnH-psbA*) markers, which we have analysed with parsimony jackknifing and Bayesian inference. A secondary goal is to explore the possible presence of cryptic species in certain cases where species delimitation has proven problematic in our earlier work (Swenson *et al.*, 2008a; Swenson & Munzinger, 2009, 2010a, b, c). This has been done by including multiple accessions of these problematic taxa, resulting in a total sample of 97 accessions, including one sample each of five outgroup taxa.

## MATERIAL AND METHODS

### NOMENCLATURE AND TAXON SAMPLING

We follow the infrageneric classification of *Pycnandra* proposed by Swenson & Munzinger (2009) with subsequent revisions (Swenson & Munzinger, 2010a, b, c). Names in the genera *Chrysophyllum* L. and *Leptostylis* Benth. that refer to species embedded in *Pycnandra* (Swenson *et al.*, 2013) but that have not yet been transferred there can be found either in the checklist of Sapotaceae (Govaerts, Frodin & Pennington, 2001) or the online *World Checklist of Selected Plant Families* at the Royal Botanic Gardens, Kew (<http://apps.kew.org/wcsp/home.do>).

We sampled 62 of the 68 known taxa of *Pycnandra*, including 51 of the 54 currently described species, two subspecies and nine new, as yet undescribed species. When the collector and collection number of a specimen are indicated, for example, *Pycnandra* Munzinger3385 and *Pycnandra* Veillon8117, they indicate an undescribed species represented by two or more accessions. The only taxa missing from our sample are those currently known as *Leptostylis longiflora* Benth. and *L. micrantha* Beauvis (both believed to be extinct) and *P. paniensis* Aubrév. and three new

species for which fresh material is not yet available. Six accessions of *P. fastuosa*, three of the closed-veined type and three of the open-veined type, were also selected. Including samples of taxa represented by multiple accessions, a total of 97 terminals were used in this study (Appendix). *Amorphospermum* F.Muell. and *Niemeyera* F.Muell., comprising one and four taxa, respectively, have been shown to be the closest relatives of *Pycnandra* (Swenson *et al.*, 2007a, 2013) and were used as outgroups.

#### MOLECULAR DATA

Plant material for DNA extraction was collected either as silica gel-dried leaf samples from living plants or fragments removed from herbarium specimens. The information content provided by various molecular markers used for phylogenetic studies of Sapotaceae was reviewed by Swenson *et al.* (2013), who concluded that the nrDNA loci ETS and ITS (ITS1, ITS2, 5.8S and parts of 18S and 26S), the nuclear gene *RPB2* (Oxelman & Bremer, 2000), and, if combined with plastid DNA, the spacer *trnH-psbA*, contain the richest source of phylogenetically informative data. We selected these four markers, which yielded 42, 42, 49 and 46 new sequences of ETS, ITS, *RPB2* and *trnH-psbA*, respectively, by following the DNA protocols for primers, extraction, amplification and sequencing described by Swenson *et al.* (2008a, 2013), Bartish *et al.* (2005), Swenson *et al.* (2013) and Hamilton (1999), respectively. Purified products were sequenced using an ABI3130xl Automated DNA Sequencer (Applied Biosystems).

Both ITS and ETS may occur in multiple copies in a genome, which can indicate the hybrid origin of a taxon (Poczai & Hyvönen, 2010). Among Sapotaceae, multiple copies of ETS have been detected in some species of *Planchonella* Pierre (Swenson, Munzinger & Bartish, 2007b) and a few species of *Pycnandra* (Swenson *et al.*, 2008a), but only as autapomorphic substitutions, which are not of any phylogenetically informative value. We nevertheless carefully checked each of the sequences used in the present study for double peaks in the proofreading procedure to detect whether multiple copies might be present.

New sequences were added to data matrices resulting from earlier studies (Swenson *et al.*, 2008a, 2013) and were aligned by hand. Visual alignment was easy and informative gaps for each locus were manually scored as binary (presence/absence) characters in a separate partition (Simmons & Ochoterena, 2000). Each gene partition was tested separately for the best-fit substitution model using jModelTest (Posada, 2008) under the Bayesian information criterion (BIC) (Schwartz, 1978; Posada & Buckley, 2004) to minimize the number of substitution rate parameters.

Binary data (gaps) were assigned a simple substitution model allowing unconstrained reversible gains/losses.

#### PHYLOGENETIC ANALYSES

Phylogenetic relationships were estimated with Bayesian inference (Rannala & Yang, 1996; Yang & Rannala, 1997) and parsimony jackknifing (Farris *et al.*, 1996). We performed separate and concatenated analyses of plastid DNA and nrDNA. The aligned matrix was prepared in BEAUti v1.8.1 (part of the BEAST package) as an output file for Bayesian inference in BEAST v1.8.1 (Drummond *et al.*, 2012). Each locus was treated as a unique partition with all nucleotide data being assigned a linked lognormal clock model whereas the binary data were assigned a simple strict clock as no prior assumption regarding rate distributions could be made for the evolution of these characters. Substitution models were set by manual modification of the rate parameters. We used the BEAST package to estimate tree topology but not divergence times under a molecular clock assumption. The molecular clock was therefore unconstrained and the root was fixed by using a normal prior with an arbitrary mean (100) and a narrow standard deviation (0.1). The tree prior was set to a birth–death process (Gernhard, 2008). The Monte Carlo Markov chains (MCMCs) were set to run five times, each for 30 million generations, to ensure independent convergence on all parameters (effective sample size values > 200), sampling trees every 15 000 generations. Convergence and chain mixing were reviewed in Tracer v1.5 (Rambaut & Drummond, 2009). A proportion of the samples in each run was discarded as burn-in, and the posterior set of trees was summarized as a Maximum Clade Credibility (MCC) tree in TreeAnnotator v1.8.1 (Drummond *et al.*, 2012). The resulting tree was then viewed in FigTree v1.4.1 (Rambaut, 2009).

Jackknife analysis, implemented in PAUP\* 4.0 (Swofford, 2002), was also performed on the dataset to retrieve parsimony support values. The settings were as follows: 1000 jackknife replicates with a single random addition sequence, TBR branch swapping, collapsing branches of zero length, steepest descent not in effect, and saving a maximum of 1000 trees in each replicate. The excluded fraction of characters in each replicate was set to 37%.

Posterior probability (PP) and parsimony jackknife values (JK) below 0.8 and 50%, respectively, are not reported. We consider PP values of 0.8–0.94 to indicate weak to moderate support and of 0.95 or more to be strong indicators of node support, whereas JK values of 50–74% are regarded as weak, 75–89% moderate and 90–100% strong support. Nodes that receive support values less than JK = 50% and

PP = 0.8 are collapsed in the phylogeny with two exceptions representing two deep splits in the phylogeny that are considered to provide informative indications of relationships.

#### MORPHOLOGICAL DATA

Morphology is highly homoplastic in Sapotaceae and unique synapomorphies are very rare or absent, so character combinations must be used to circumscribe most groups (Swenson & Anderberg, 2005; Swenson *et al.*, 2007a, 2008a, 2013; Swenson, Richardson & Bartish, 2008b; Gautier *et al.*, 2013). For example, in this assemblage of New Caledonian taxa, an isomeric versus anisomeric flower and the number of stamens opposite each corolla lobe, two features traditionally used as cardinal characters, have been shown to be of little taxonomic use (Swenson *et al.*, 2008a). Swenson & Munzinger (2009, 2010a, b, c) used a suite of nearly a dozen characters for *Pycnanandra*, which we have adopted here as traits in the BEAST analysis. These traits are mapped as discrete units, as implemented in BEAST (Lemey *et al.*, 2009), which integrates over the uncertainty of the trait model as well as the tree topology. Character changes are reported when PP values exceed 50%. Morphological terms follow Harris & Harris (1997).

*Character 1.* Leaves are usually alternate in *Pycnanandra* (Fig. 1), but opposite and decussate leaves are diagnostic for the species traditionally placed in *Leptostylis* (Fig. 1F). One species currently referred to as *Chrysophyllum wagapense* Guillaumin has alternate to sub-opposite leaves with very short internodes, resulting in a 'subverticillate' leaf arrangement.

*Character 2.* Malpighiaceae trichomes are usually present in Sapotaceae, forming an indument on various organs. The lower surface of leaves is pubescent, glabrescent or glabrous, a rather stable character in many taxa. Some species have a silvery pellicle formed by stalkless trichomes that are tightly appressed to the surface.

*Character 3.* Tertiary veins generally form four patterns: reticulate, reticulate and parallel, reticulate and oblique, or oblique. A reticulate pattern is characterized by irregular and oblique tertiaries that cross between and anastomose with adjacent secondaries at an angle of approximately 90°. Apart from these two rather distinct patterns, reticulate veins are combined with some parallel or oblique tertiaries.

*Character 4.* In Sapotaceae, one or more bracts usually subtend each flower. In *Pycnanandra*, there are usually several bracts, often borne along the pedicel, and sometimes they increase in size towards the flower, becoming difficult to distinguish from the sepals.

*Character 5.* The calyx of most members of *Pycnanandra* usually has five (or more) sepals, but four sepals are diagnostic for those traditionally placed in *Leptostylis* (Pennington, 1991).

*Character 6.* The corolla of Sapotaceae is actinomorphic and partly sympetalous, comprising a tube and free corolla lobes. In *Pycnanandra*, the corolla is quite homogeneous and is usually cup-shaped, but the number of corolla lobes varies, even between sister taxa, which introduces noise in phylogenetic analysis (Swenson *et al.*, 2008a). One potentially informative character, however, is whether the corolla is pubescent or glabrous. Regardless of the density of indument, which may vary from the presence of a few trichomes to tomentulose, it has always been scored simply as 'pubescent'.

*Character 7.* Another pertinent character used in the interim subgeneric key to the subgenera of *Pycnanandra* is whether the corolla lobes are recurved (Fig. 1F) or spreading (Fig. 1H). Recurved corolla lobes are typical for subgenus *Pycnanandra* and spreading corolla lobes are present in subgenera *Achradoctypus* and *Trouettia*, but it is less clear how this character is expressed elsewhere in the genus.

*Character 8.* Ovaries in Sapotaceae are either pubescent or glabrous, a character strongly correlated with the generic boundaries foreseen by Swenson *et al.* (2008a). As with the corolla, the presence of indument, even if only represented by a minute ring of trichomes around the ovary base, has been scored as 'pubescent'.

*Character 9.* Classifying the form of fruits is difficult and at least in part subjective because it may vary depending on whether a fruit is immature or mature, the ovules it contains are unfertilized or fertilized, or whether insects have infested it. Moreover, characterization of fruits must often be done based on herbarium specimens that are poorly preserved and/or are fragmentary, bearing a limited number of fruits. Notwithstanding these difficulties, we have applied the forms ellipsoid, obovoid, cylindrical, ovoid and globose to the best of our ability, decisions in many cases based on field observations in addition to examined herbarium material.

#### DIVERSIFICATION ANALYSIS

To estimate and visualize relative speciation rates in *Pycnanandra*, the mode of speciation (i.e. the relationship between speciation and extinction) was estimated using the laser package in R (Rabotsky, 2006; R Core Team, 2014). The topology was tested against seven speciation scenarios (Pure birth, Birth/Death, Logistic density dependency, Exponential density dependency, Variable speciation vs. constant extinction, Constant speciation vs. variable extinction, and Variable speciation vs. variable extinction) using the lowest Akaike

information criterion (AIC) score as selection criterion. We plotted the cumulative accumulation of lineages for the genus as well as for each of its subgenera separately, using Lineage Through Time (LTT) plots in R (Nee *et al.*, 1995) based on the posterior MCC tree from the Bayesian analysis. As LTT plots are sensitive to sampling density, species represented by multiple accessions were reduced to a single sample. Also, as the Bayesian tree topology lacks a time calibration, the ages of the lineages are represented by relative values between present time (0) and the arbitrarily set age of the root (100), which corresponds to the split between *Pycnandra* and *Niemeyera* estimated at 29.8 (22.3–38.0) Mya (Swenson *et al.*, 2014).

## RESULTS

### DATA

The complete molecular matrix contains 3186 characters, of which 3150 are from aligned nuclear sequences and 36 from four partitions of coded gaps (Table 1). ETS is represented by 444 nucleotides of which 79 (19.1%) are parsimony informative, ITS of 891 nucleotides of which 138 (15.5%) are informative, *RPB2* of 1218 nucleotides of which 50 (4.1%) are informative, and *trnH-psbA* of 597 nucleotides with only 10 (1.7%) informative sites. Comparing the nucleotide information content in the *Pycnandra* matrix with that for the entire group of Australasian Chrysophylloideae (Swenson *et al.*, 2013) shows a decrease in information content ranging from 56 to 68%, depending on the marker. Moreover, *trnH-psbA* contributes only ten informative sites in the *Pycnandra* matrix, which is few given that it is the most useful plastid DNA marker in Sapotaceae as a whole. The model test resulted in the selection of K80+G for ETS and ITS, and HKY+G for *RPB2* and *trnH-psbA*.

### TREE TOPOLOGY

Bayesian analysis and parsimony jackknifing of the molecular dataset recovered similar tree topologies.

After collapsing nodes with support below the defined thresholds (PP = 0.8 and JK = 50%), the main differences in topology are that the Bayesian inference tree shows better resolution at deep nodes than the parsimony tree (Fig. 2). Eleven of the nodes supported in the Bayesian tree lack jackknife support, and the converse applies to four nodes. Two deep nodes for which support was less than the adopted threshold values are reported here only as an indication of relationships of main clades. The poor resolution of the earliest diversification events found in the tree presented here is consistent with the results of previous studies (Swenson *et al.*, 2007a, 2008b, 2013). Analyses of the plastid DNA dataset alone, to discover incongruence, yielded only a comb with significant support (PP 0.96) for two accessions of *Pycnandra obscurinerva* (data not shown).

The species are recovered in five well-supported clades that correspond to the groups recognized in the classification proposed by Swenson & Munzinger (2009). A clade of four species analysed here for the first time, namely *Pycnandra confusa* Swenson & Munzinger, *P. heteromera* (Vink) Swenson & Munzinger, *P. intermedia* (Baill.) Swenson & Munzinger and *P. lissophylla* (Pierre ex Baill.) Swenson & Munzinger, are recovered as sister to subgenus *Sebertia*, which Swenson & Munzinger (2010c) circumscribed with only two species (Fig. 2).

*Chrysophyllum wagapense*, suggested to represent *Pycnandra* subgenus *Wagapensia* (Swenson & Munzinger, 2009), is strongly supported as sister to subgenus *Leptostylis*, a group that currently is under review for publication elsewhere. Together, these two groups are sister (PP 0.80) to the well-supported (PP 1.0) subgenus *Achradotypus*. Subgenera *Pycnandra* and *Trouettia* are both recovered with strong Bayesian support (PP 1.0), although their sister relationship is not well supported (PP 0.75).

With respect to possible cryptic species, two, *Pycnandra lissophylla* (two accessions) and *P. obscurinerva* (four accessions), are placed in subgenera *Sebertia* and *Trouettia*, respectively, in which the

**Table 1.** Characteristics of molecular sequences in each of the data partitions

| Data             | Number of characters |         |          |               |             | Potentially informative | Gaps |
|------------------|----------------------|---------|----------|---------------|-------------|-------------------------|------|
|                  | Genome               | Aligned | Constant | Uninformative |             |                         |      |
| ETS              | nrDNA                | 444     | 280      | 85            | 79 (19.1%)  | 8                       |      |
| ITS              | nrDNA                | 891     | 657      | 96            | 138 (15.5%) | 21                      |      |
| <i>RPB2</i>      | nDNA                 | 1218    | 1055     | 113           | 50 (4.1%)   | 3                       |      |
| <i>trnH-psbA</i> | plastid DNA          | 597     | 545      | 42            | 10 (1.7%)   | 4                       |      |
| Total            | totDNA               | 3150    | 2536     | 336           | 278 (8.8%)  | 36                      |      |

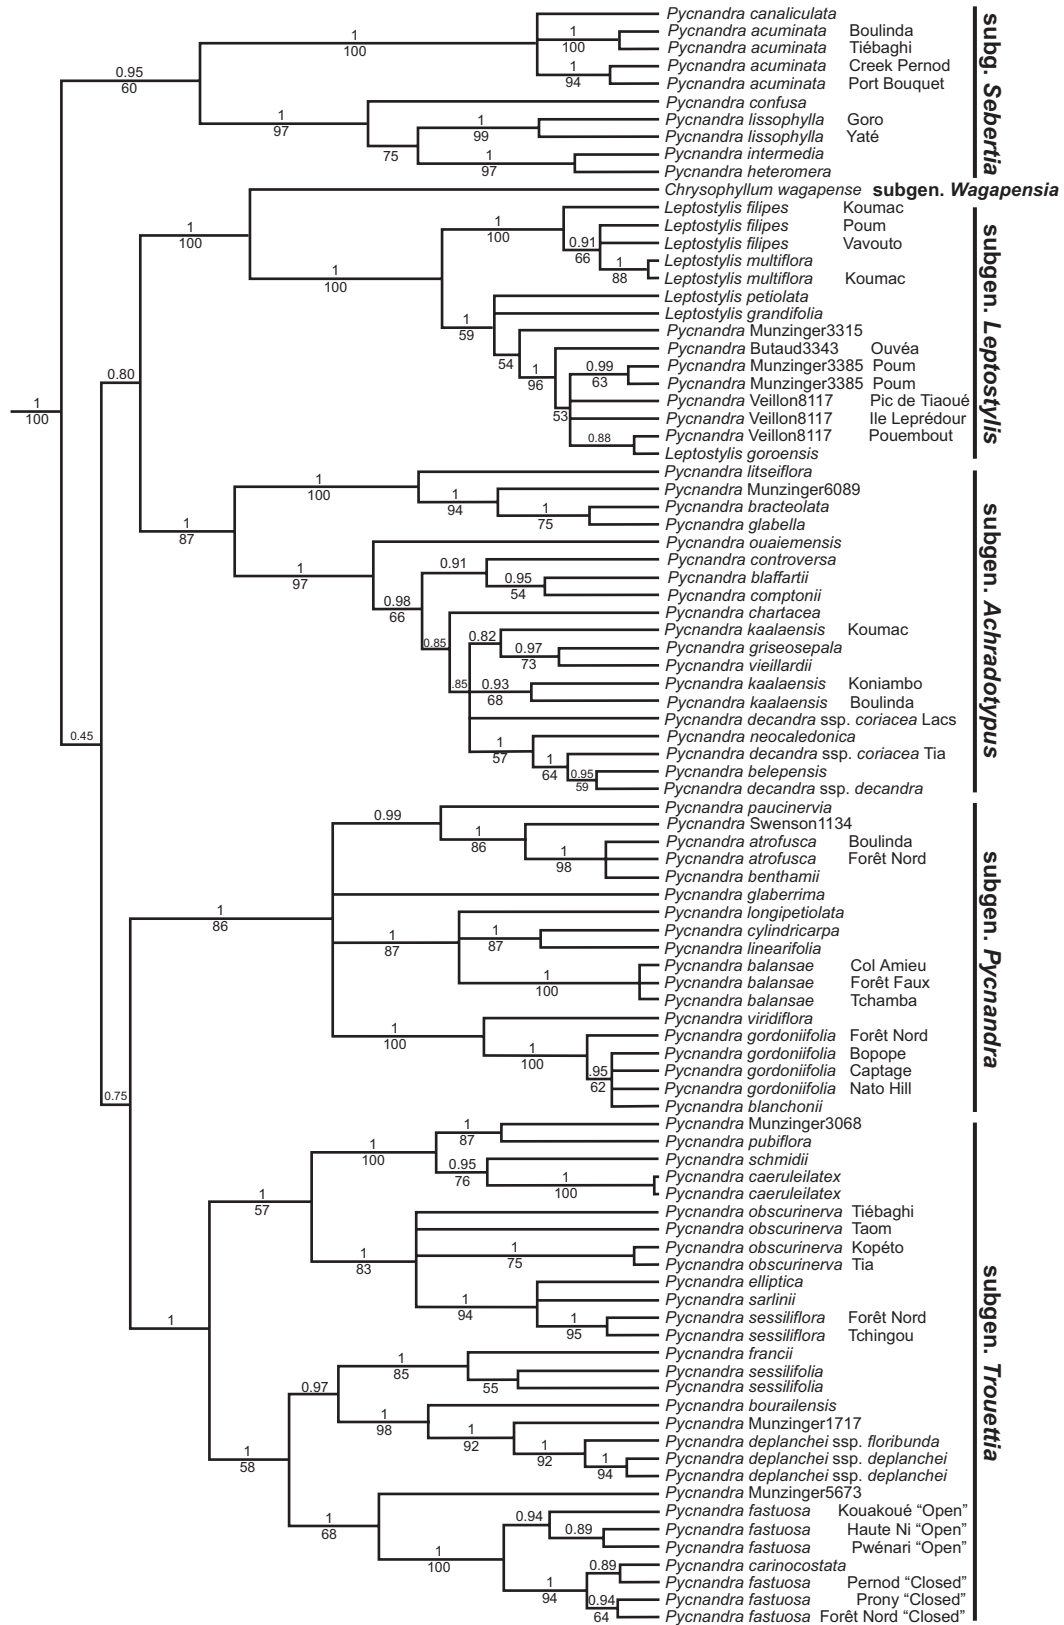

**Figure 2.** See caption on next page.



**Figure 2.** Maximum clade credibility tree and jackknife tree obtained, respectively, from the BEAST and the parsimony analyses of nrDNA and plastid DNA sequences of *Pycnandra* (Sapotaceae) from New Caledonia. To the right are locations of multiple accessions and the subgeneric classification proposed by Swenson & Munzinger (2009). Posterior probabilities (PP; above) and parsimony jackknifing (JK; below) are given along the branches. Nodes with support less than PP 0.8 and JK 50% are collapsed, except for two early splits. The outgroups, *Amorphospermum* and *Niemeyera*, have been pruned from the figure.

former is monophyletic and the latter forms a polytomy with four other species. All six accessions of *P. fastuosa* and *P. carinocostata* Vink form a clade with maximum support. Accessions of this group are placed in two subclades, with moderate to strong support (PP 0.94–1.0), which include the closed- and open-veined types, respectively. However, *P. carinocostata* is embedded in the closed-veined type. The accession from Ouvéa, Loyalty Islands (Butaud 3343), is sister, with weak parsimony support (JK 53%), to one described and two undescribed species, one of which, *P. Veillon8117*, is not rendered monophyletic. Similar situations of paraphyly or non-monophyly are revealed for *Leptostylis filipes* Benth., *P. kaalaensis* Aubrév., *P. decandra* (Montrouz.) Vink and *P. gordoniifolia* (S.Moore) Swenson & Munzinger.

#### OPTIMIZATION OF MORPHOLOGY

Figures 3 and 4 report eight morphological characters as traits on the MCC tree obtained from the BEAST analysis. All of these characters except leaf arrangement and the number of sepals (character 5, data not shown) exhibit at least some degree of homoplasy, as discussed below.

#### DIVERSIFICATION THROUGH TIME

The best-fit speciation model ( $\Delta AIC > 10$ ) for *Pycnandra* was a logistic density-dependent function with constant speciation rate coupled to an increasing extinction rate. The LTT plots for *Pycnandra* and each of its subgenera indicate three potential relative time intervals during which the net speciation rate has been zero (Fig. 5). This decrease in speciation rate is most apparent at the two later time intervals (intervals II and III).

## DISCUSSION

#### CLASSIFICATION OF *PYCNANDRA*

Diagnostic characters for *Pycnandra* include non-areolate higher leaf venation, sepals glabrous inside, stamens usually inserted in the corolla tube orifice, no staminodes, a simple style, a fruit with a single seed, included radicle and pink plano-convex cotyledons with no endosperm (Swenson *et al.*, 2013). The phylogenetic analysis of *Pycnandra* presented here based

on samples of all but six of the currently recognized species (including nine that remain to be described) groups the species in six well to strongly supported clades (Fig. 2). Sampling, resolution and branch support are improved compared with the previous phylogenetic estimate (Swenson *et al.*, 2008a), and the clades themselves, here assigned to subgenera, are generally the same. Consideration must therefore be given to whether these clades are better recognized as genera *sensu* Swenson *et al.* (2008a) or subgenera *sensu* Swenson & Munzinger (2009). Beginning with the deep nodes, support is weak or negligible so relationships of the main clades remain uncertain. Turning to the surveyed morphological characters, we conclude that all but two features (leaf arrangement and number of sepals) are homoplasious and cannot in any combination clearly diagnose meaningful genera (Figs 3, 4). Opposite leaves (Fig. 3A) combined with four sepals (data not shown) are diagnostic for *Leptostylis*, which is embedded in the larger clade. Moreover, the discovery of *P. viridiflora* Swenson & Munzinger and the examination of its characters, which prompted Swenson & Munzinger (2009) to propose recognizing a single, broad genus (*Pycnandra s.l.*) in which subgenera are recognized, disqualifies the glabrous ovary as a synapomorphy for *Pycnandra s.s.* (Fig. 4C). Similar patterns of homoplasy are evident for the other characters, and we therefore concur with Swenson & Munzinger (2009) that it is preferable to circumscribe *Pycnandra* broadly and to recognize subgenera in order to reflect phylogenetic information in the group. This approach upholds the principle of monophyly, facilitates identification of the genus and maximizes nomenclatural stability (Backlund & Bremer, 1998), necessitating eight new combinations rather than 32 if the alternative approach were used. Below we explore how the optimized characters converge with the tree topology and how well they align with the proposed subgenera.

Subgenus *Sebertia* was distinguished by the presence of small, 2- to 3-mm-wide, white, open flowers, a fruit with a scale-like epidermis and the absence of a remnant style on the fruit apex (Swenson & Munzinger, 2010c). The analyses presented here place four additional species (*P. confusa*, *P. heteromera*, *P. intermedia* and *P. lissophylla*), originally included tentatively in subgenus *Trouettia*, as sister to the clade that includes the two species originally assigned

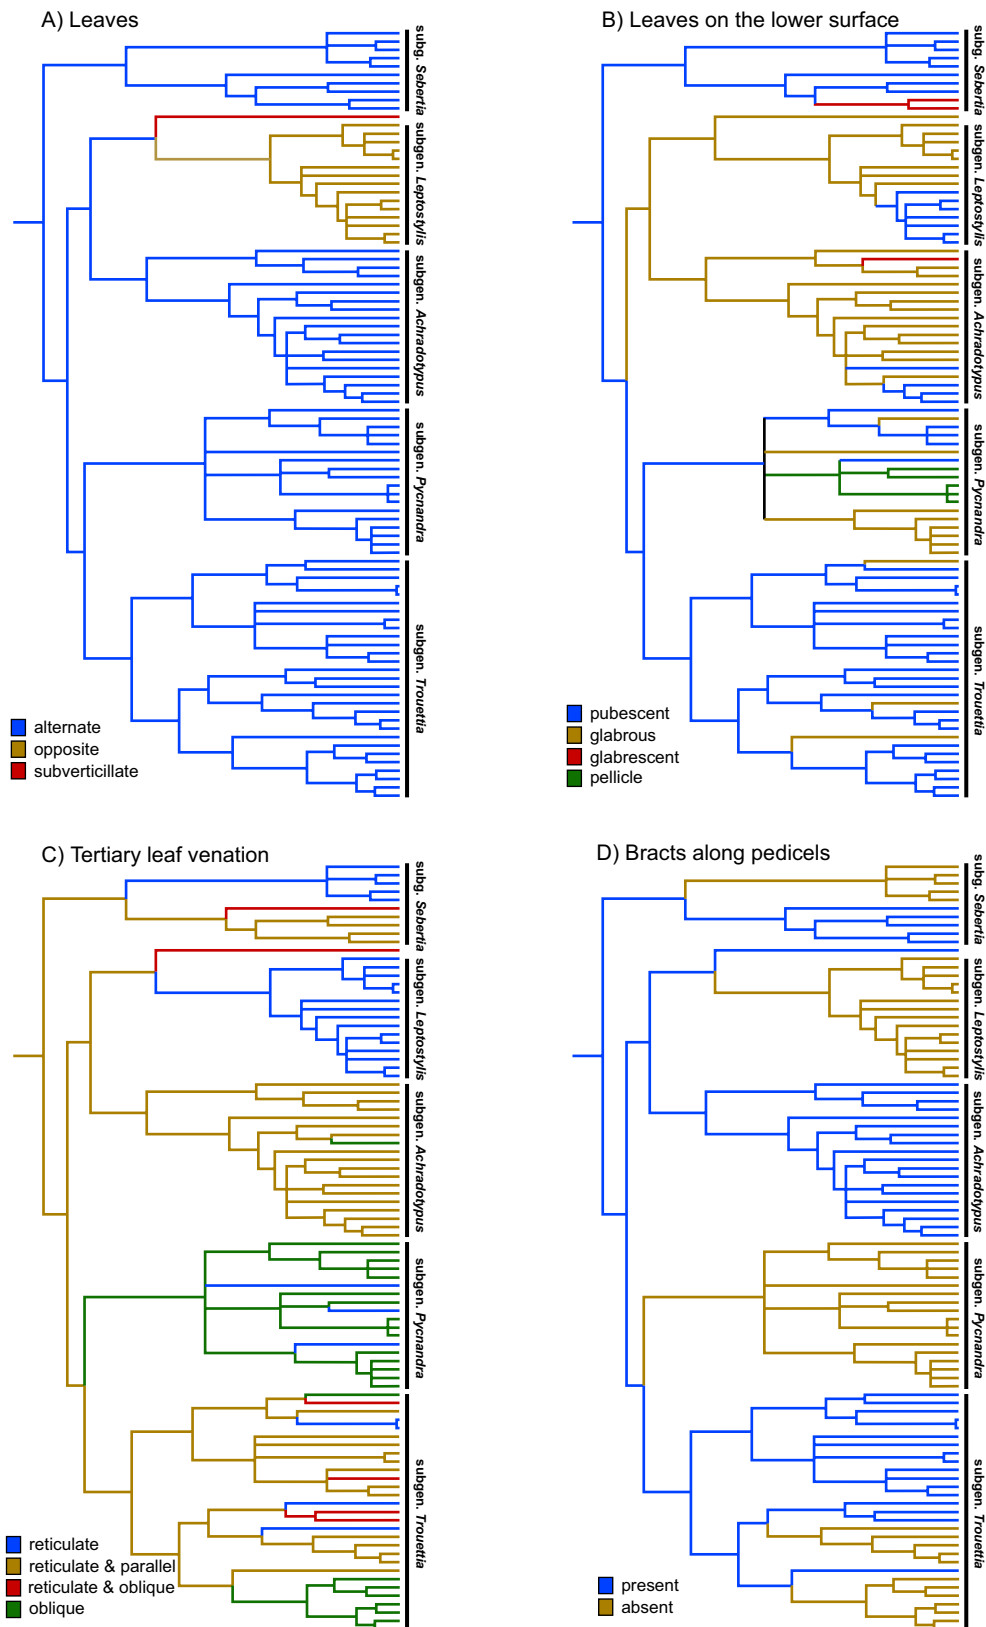

**Figure 3.** Four morphological characters visualized on the maximum clade credibility tree obtained in the BEAST analysis of molecular data of *Pycnantra* (Sapotaceae). The distribution of sepal number (not shown) is similar to A, where subgenus *Leptostylis* has four sepals (brown) and all other taxa have five or more sepals (blue or red).

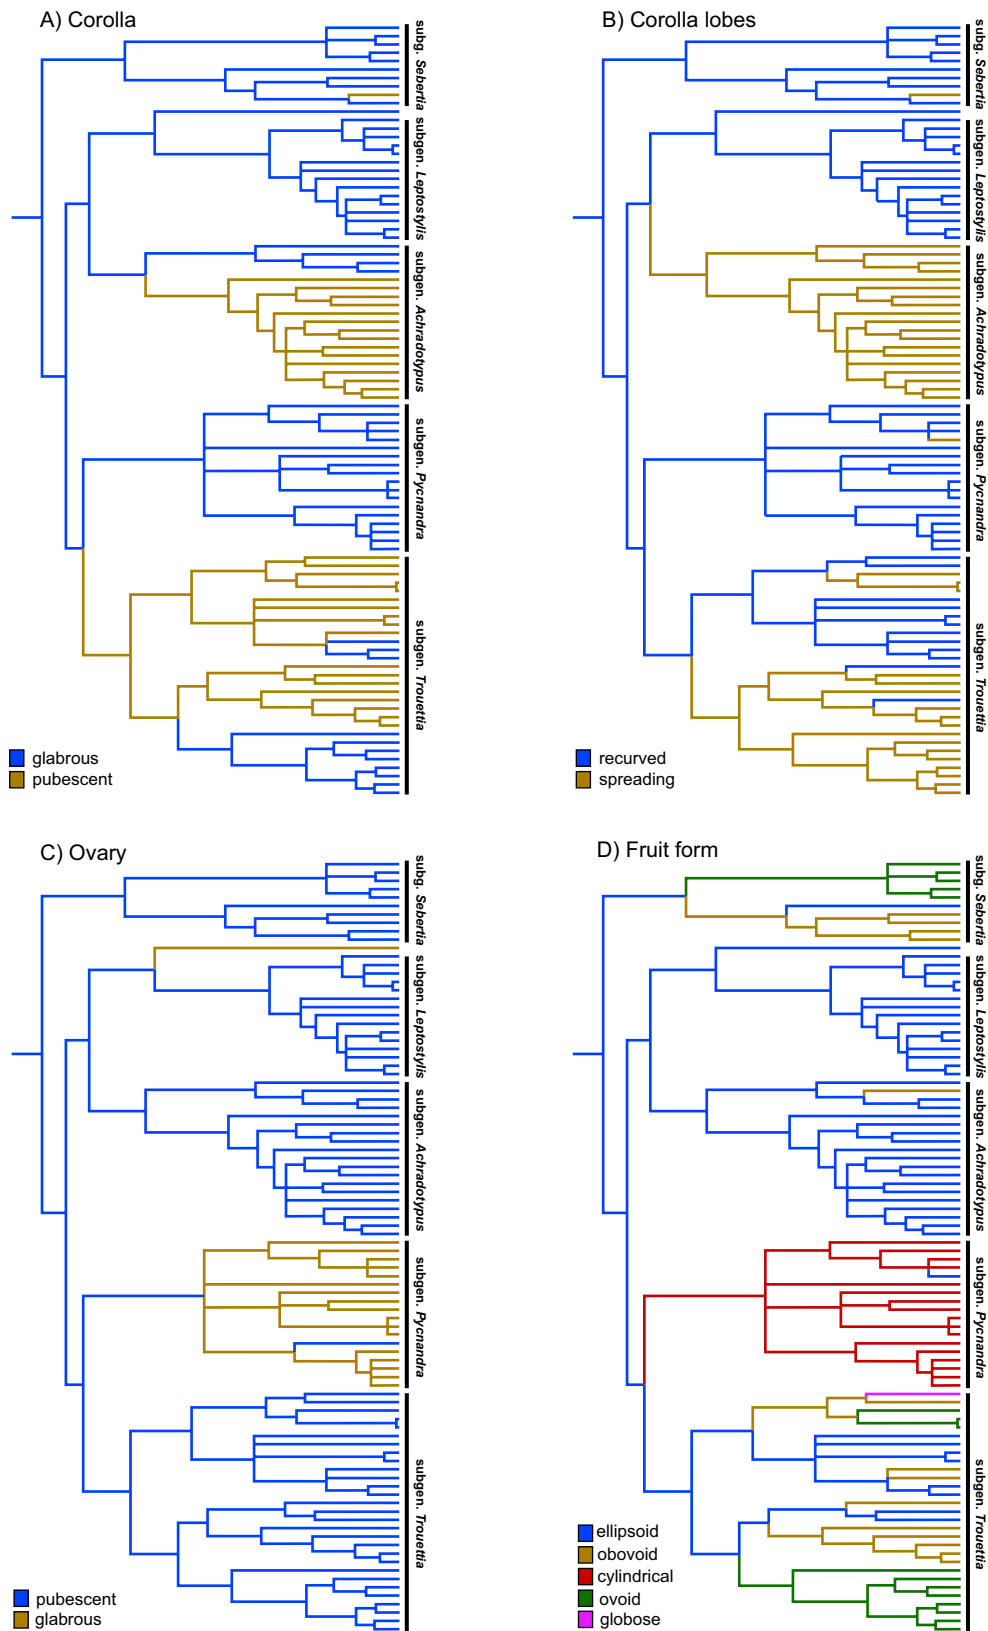

**Figure 4.** Four morphological characters visualized on the maximum clade credibility tree obtained in the BEAST analysis of molecular data of *Pycnantra* (Sapotaceae).

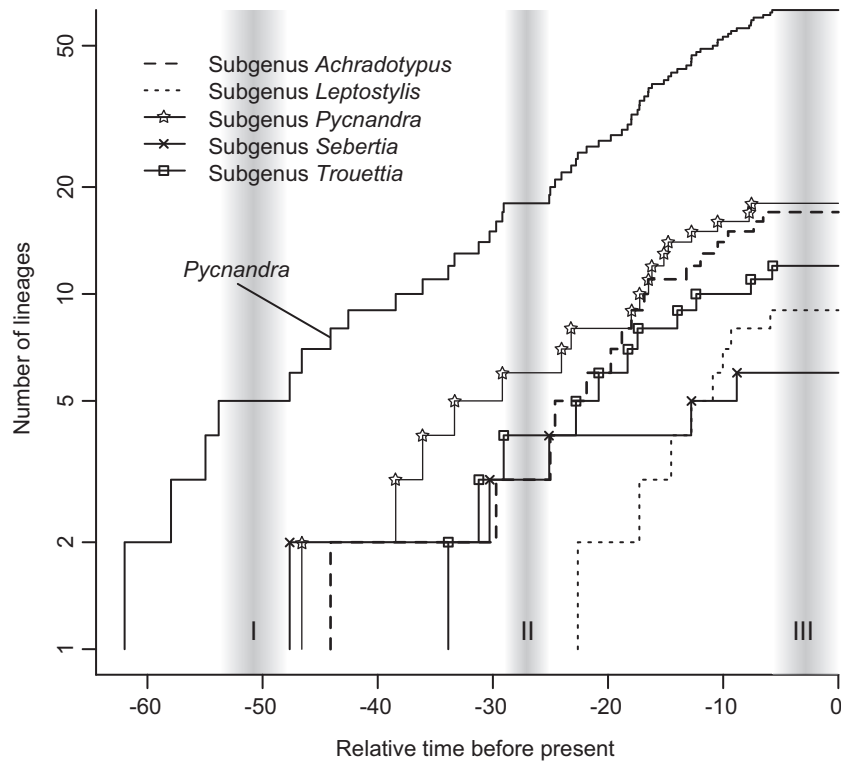

**Figure 5.** Lineage through time (LTT) plots of *Pycnandra* (Sapotaceae) and its subgenera in New Caledonia, showing that speciation rate drastically decreases to zero in three intervals (I, II and III) relative to present time.

to subgenus *Sebertia*. These four species, however, have a somewhat larger corolla (3–6 mm wide), lack scales on the fruits and have a minute remnant style. Among the other characters examined, only leaf arrangement, number of sepals and the presence of indument on the ovary are shared among all members of this clade, but these characters are also present in subgenera *Achradotypus* and *Trouettia*. It is thus difficult to characterize subgenus *Sebertia*, and although the four new additions could be treated as a seventh subgenus, we refrain from doing so because this new group would have a combination of characters similar to subgenera *Achradotypus* and *Trouettia*.

Our results indicate that the proposed subgenus *Wagapensia*, comprising a single species (*Chrysophyllum wagapense*), merits recognition as a monotypic taxon. It is easily distinguished from all congeners by its sub-verticillate leaves (Fig. 3A), shoots that are borne beneath the apical clusters of leaves and a trilocular ovary. The last two characters are autapomorphies, and as such are uninformative for assessing phylogenetic relationships and were therefore not optimized in the BEAST analysis. Subgenus *Wagapensia* shares a glabrous ovary with most members of subgenus *Pycnandra* (Fig. 4C), but is easily distinguished by its leaf and shoot arrangement.

Subgenus *Leptostylis* is distinguished by the presence of opposite and decussate leaves (Figs 1F, 3A), four sepals (not shown) and an ovary with four locules. All other members of the genus have alternate leaves (sub-verticillate in subgenus *Wagapensia*) and flowers with five or more sepals. Subgenus *Leptostylis* is thus readily identified on the basis of these characters, but because the clade is embedded in the broad *Pycnandra* clade, it cannot be recognized as a distinct genus if the other groups are maintained as subgenera in *Pycnandra*.

Presence or absence of indument on the lower leaf surface (Fig. 3B) and of bracts along the pedicel (Fig. 3D) were suggested to be useful by Swenson & Munzinger (2009) to distinguish between subgenera *Achradotypus* and *Trouettia*. These two characters, however, prove to be less informative when a larger taxon sample is used. All except two species of subgenus *Achradotypus* (*P. belepensis* Swenson & Munzinger and *P. decandra*) have glabrous leaves, but this feature is also found in three undescribed species recovered in subgenus *Trouettia* (*P. Munzinger1717*, *P. Munzinger3068* and *P. Munzinger5673*). Likewise, bracts along the pedicel are found in all members of subgenus *Achradotypus* and the majority of species in subgenus *Trouettia*. In general, however, subgenus *Achradotypus* usually has one to three bracts borne

KEY TO THE SUBGENERA OF *PYCNANDRA*

1. Leaves opposite; sepals four; ovaries with four locules.....*P.* subgenus *Leptostylis*
1. Leaves alternate or  $\pm$  verticillate; sepals five or more; ovaries with three, five or more locules.....2
2. Leaves  $\pm$  verticillate; leafy shoots borne beneath clusters of leaves; ovaries with three locules.....  
.....*P.* subgenus *Wagapensia*
2. Leaves alternate; leafy shoots not as described above; ovaries with five or more locules.....3
3. Ovaries glabrous (except in *P. viridiflora*); fruits cylindrical (except *P. benthamii*).....*P.* subgenus *Pycnandra*
3. Ovaries pubescent, at least around the base; fruits not cylindrical.....4
4. Lower leaf surface glabrous (except in *P. belepensis* and *P. decandra*).....*P.* subgenus *Achradotypus*
4. Lower leaf surface pubescent (except in three as yet undescribed species).....5
5. Corolla usually pubescent (except in *P. carinocostata*, *P. fastuosa*, *P. sarlinii* and *P. sessiliflora*).....  
.....*P.* subgenus *Trouettia*
5. Corolla glabrous (except in *P. intermedia*).....*P.* subgenus *Sebertia*

along the pedicel, in contrast to subgenus *Trouettia* with sessile or shortly pedicellate flowers, such that the bracts are imbricate and closely spaced, making it difficult to distinguish them from the sepals. This is true for *P. caeruleilatex* Swenson & Munzinger, *P. elliptica* Swenson & Munzinger, *P. sarlinii* (Aubrév.) Swenson & Munzinger and *P. sessiliflora* Swenson & Munzinger, but not for the others. If a specimen has a corolla bearing some trichomes or indument, it probably belongs to either subgenus *Achradotypus* or *Trouettia*, except for *P. intermedia* in subgenus *Sebertia* (Fig. 4A). Apart from this, we have found no better diagnostic character for these two subgenera, despite the strong molecular support for each of them and the fact that they do not comprise sister groups in the genus.

Two features characterize the majority of members in subgenus *Pycnandra*: a glabrous ovary (Fig. 4C) and a cylindrical fruit (Fig. 4D). However, two species deviate from this character combination. The generic type, *P. benthamii* Baill., is the only member of the subgenus with an ellipsoid fruit, and it also has rather large, up to 25-mm-wide, red flowers (vs. 5- to 7-mm-wide, white flowers elsewhere in the subgenus) with spreading instead of recurved corolla lobes (Fig. 4B). *Pycnandra viridiflora* is strongly embedded in subgenus *Pycnandra*, despite having a rather atypical combination of characters. It is the only member with greenish flowers and indument on the ovary. The fruit is predicted to be cylindrical, but to date it remains unknown. Species with leaves bearing a silvery pellicle on the lower surface can easily be recognized and belong to subgenus *Pycnandra* (Fig. 3B).

In summary, we propose that the species of *Pycnandra* are best classified in six subgenera as circumscribed here, because these infrageneric groups are consistent with and well supported by the results from phylogenetic estimates. Relationships among some of the subgenera, however, remain uncertain. Subgenera *Leptostylis*, *Pycnandra* and *Wagapensia*

are each readily distinguished on the basis of one or more characters (with the exception of *P. viridiflora*) and species of subgenus *Achradotypus* are usually recognizable. Members of subgenera *Sebertia* and *Trouettia* are, however, difficult to place based on morphology. With this in mind, we provide a provisional key to the subgenera of *Pycnandra*.

## CRYPTIC SPECIES

The results of our phylogenetic analyses show that *P. lissophylla* and *P. obscurinerva* belong to separate subgenera (*Sebertia* and *Trouettia*, respectively), confirming that they represent separate species despite their strong morphological similarity (Swenson & Munzinger, 2010b). The potentially most reliable character we have been able to find to distinguish between them is fruit form, which is obovoid in *P. lissophylla* and ellipsoid or fusiform in *P. obscurinerva* (Fig. 4D). Due to the potential risk of misidentification, this finding has important implications for conservation. *Pycnandra lissophylla* is a rather common shrub in the large southern ultramafic plain of Grande Terre, with populations in the Fausse Yaté and Yaté Barrage protected areas, and has been assigned a preliminary IUCN risk of extinction status of Least Concern. In contrast, *P. obscurinerva* is restricted to the unprotected mountain massifs along the north-west coast, many of which are being impacted by mining and fire, resulting in a preliminary IUCN status of Vulnerable.

The six accessions of *P. fastuosa* used in our study are placed in a maximally supported clade that also includes the single accession of *P. carinocostata*. In this clade, two well-supported subclades are found, one corresponding to three accessions of *P. fastuosa* with open-veined leaves and the other to three accessions of this same species with closed-veined leaves, among which the sample of *P. carinocostata* is nested. These findings suggest the possibility that *P. fastuosa*, as currently circumscribed, may represent two sepa-

rate entities. They also reveal a potential problem regarding the position of *P. carinocostata*, which is readily distinguished by its small, oblong and brochidodromous-veined leaves and the presence of pedicellate flowers not borne on burls, whereas *P. fastuosa* has rather large, ovate or elliptical, eucamptodromous-veined leaves and sessile flowers borne on burls (see figures in Swenson & Munzinger, 2010b). Both of these species are trees and occupy humid forests on ultramafic substrate, and their distributions are more or less the same on Grande Terre. There seems little doubt that the closed-veined type of *P. fastuosa* and *P. carinocostata* share a common ancestor, but the fact that the former do not form a clade is perplexing. This may be a case of incomplete lineage sorting, plastid capture or anagenetic speciation, but the currently available information is not sufficient to determine whether any of these possible explanations is correct. Regardless, it seems likely that the open- and closed-veined types of *P. fastuosa* could be considered a cryptic sibling sister species pair *sensu* Bickford *et al.* (2007), i.e. two species that are each other's closest relative but have not diverged sufficiently to be easily distinguishable from one another. As mentioned above, the differences in venation patterns and altitudinal range triggered our suspicion that they might represent two separate entities and prompted us to include three accessions of each type in our study. Leaves of the type material *P. fastuosa* correspond to the closed-veined type, and we therefore suggest that the open-veined type may merit recognition as a new species, although adequate flowering and fruiting material is not yet available for a full comparison and formal description.

#### INCIPIENT SPECIATION

By exploring the number of lineages through time in New Caledonian plants and animals, Espeland & Muriene (2011) found a decrease in speciation rate over time in eight out of nine groups, supporting the view that the island was once fully submerged and that colonization by dispersal took place when it subsequently re-emerged, corresponding to the notion of an old Darwinian island (Grandcolas *et al.*, 2008). Additional studies, including Pillon's (2012) review based on 12 plant lineages and subsequent studies based on dated phylogenetic trees in *Ficus* L. section *Oreosyce* (Miq.) Corner (Moraceae) and their *Dolichoris* pollinators (Hymenoptera, Agaonidae) (Cruaud *et al.*, 2012), *Diospyros* L. (Ebenaceae, Turner *et al.*, 2013b) and Psychotriaceae (Rubiaceae, Barrabé *et al.*, 2014), also concluded that the presence of each of these groups in New Caledonia dates back to < 35 Mya. Our phylogenetic analysis using 91% of *Pycnandra* spp. based on nuclear and plastid DNA data shows the same pattern

and indicates that the diversification rate came to an almost complete halt during three time intervals (Fig. 5). Considering that the split between *Pycnandra* and *Niemeyera* occurred *c.* 29.8 Mya (Swenson *et al.*, 2014) and that this event was arbitrarily set to a value of 100 for the present study, these three intervals of arrested diversification correspond to 15.8–14.3, 8.6–7.5, and 1.5 Mya to present. The first of these events suggests no diversification at the time of establishment in New Caledonia and the subsequent events indicate slowdowns once diversification had begun. A slowdown in molecular divergence does not, however, necessarily mean that morphological evolution also ceased. For example, several morphologically distinct species evolved during the most recent of the three periods. Although it may not be possible to determine whether the evolution of species in *Pycnandra* is due to concerted evolution, incomplete lineage sorting, hybridization, recent cladogenesis, anagenesis or some combination thereof (Stuessy, Crawford & Marticorena, 1990; Álvarez & Wendel, 2003; Stuessy *et al.*, 2006), we nevertheless explore three cases below: (i) *Pycnandra* Veillon8117 and *L. goroensis* Aubrév.; (ii) *P. kaalaensis*; and (iii) *P. gordoniiifolia* and *P. blanchonii* (Aubrév.) Swenson & Munzinger.

*Pycnandra* Veillon8117, a well-delimited, undescribed species belonging to subgenus *Leptostylis*, grows in dry forests of coastal western Grande Terre, where it occurs exclusively on black clays and calcareous substrates. The three accessions included in our analysis do not form a monophyletic group, but rather are part of a polytomy, in which one accession from Pouembout forms a weakly supported clade (PP 0.88) with the sole accession of *P. goroensis*, a locally endemic species known only from extreme south-eastern Grande Terre, where it grows on rocky slopes near the sea on ultramafic substrates. These two species are clearly distinct: *P.* Veillon8117 is a small tree with oblanceolate leaves and flowers that are pinkish and *c.* 3 mm wide, whereas *P. goroensis* is a shrub with obovate leaves and flowers that are pure white and 9–12 mm wide (Fig. 1E, F). The placement of *P. goroensis* may represent incomplete lineage sorting, an example of anagenetic speciation or a stochastic artefact. However, hybridization or introgression is unlikely, because these species are separated by > 100 km that includes several mountain ranges and they occur on different soil types.

*Pycnandra kaalaensis* is a member of subgenus *Achradotyplus* and is widely distributed in maquis vegetation along the north-western coast of Grande Terre, from the Boulinda massif northward to the hills west of Poum (Fig. 1G). In their revision of the subgenus, Swenson & Munzinger (2010a) noted that the size of the leaves and petioles varies in this species, suggesting that it might indicate the presence of several

lineages. In an attempt to explore this possibility, we included three accessions of *P. kaalaensis* in the present study, one from Koumac in the north, one from Koniambo near the centre of the range of the species and one from Boulinda in the south. Resolution and support for relationships in the part of the phylogenetic tree that includes this species are weak, but there is some indication that the accession from Koumac may not be conspecific with those from more southern populations. On the other hand, the accessions from Koumac and Boulinda have leaves with similar morphologies, in particular short petioles and oblanceolate lamina, but they do not group together. In contrast, the accession from Koniambo, in the middle of the range, has elliptic leaves with 3- to 4-cm-long petioles, and it groups with the other morphological type from Boulinda. This suggests a possible case of incipient speciation, incomplete lineage sorting or hybridization.

*Pycnandra gordoniiifolia* and *P. blanchonii* belong to subgenus *Pycnandra* and form a clade with maximum support, sister to *P. viridiflora*. The first of these species is morphologically homogeneous, comprising white flowered trees up to 12 m tall that occur in humid, mesophyll and gallery forests on substrate derived from various rock types such as schist, greywacke and serpentinite (Swenson & Munzinger, 2009). In contrast, *P. blanchonii* forms red flowered shrubs, restricted to maquis vegetation on ultramafic substrates (in particular serpentinite), and is easily distinguished from *P. gordoniiifolia* (Fig. 1H, I). These two species (except the accession from Forêt Nord) have identical molecular sequences in our study. On the other hand, *P. blanchonii* has been confused with *P. kaalaensis* of subgenus *Achradotypus* discussed above, a shrubby species with pink or red flowers growing in maquis, suggesting convergence in these two lineages associated with adaptation to similar abiotic factors. It is therefore tempting to speculate that *P. blanchonii* originated from *P. gordoniiifolia* through anagenesis and species radiation.

#### WHERE TO LOOK FOR CRYPTIC SPECIES IN NEW CALEDONIA

There is no doubt that the evolution of the New Caledonian biota is complex and it is interesting to consider where one might search for additional possible examples of cryptic species. Pillon *et al.* (2009) identified polyphyly in two species of *Spiraeanthemum* A. Gray (Cunoniaceae), which they interpreted as cryptic species with one element growing on ultramafic substrate and the other on non-ultramafic substrate. Given that about 25% of the forest species in New Caledonia are found on both types of substrates (Ibanez *et al.*, 2014), we suggest that they may

contain additional cases of cryptic species. However, the example of cryptic species represented by *P. lissophylla* and *P. obscurinerva* is rather different in that these two entities occur in similar habitat on ultramafic soil but appear to be geographically and genetically separated between the large ultramafic plain in the south and the ultramafic mountains along the north-west coast. This suggests that a disjunct distribution between geographically separated areas of ultramafic substrate may present a barrier to gene flow and thus lead to the evolution of cryptic species. In yet another example, the open- and closed-veined types of *P. fastuosa*, which we have also identified as a case of cryptic sibling species, co-occur on the same substrate type and exhibit a slight differentiation in elevational range (the open-veined type occurs also at higher elevations), suggesting that abiotic factors may be important for speciation even though the lineages are sympatric. In terms of reproductive biology, virtually nothing is known about Sapotaceae except for three species of *Planchonella* in New Caledonia (Méndez & Munzinger, 2010) and one species of *Micropholis* (Griseb.) Pierre in South America (Terra-Araujo *et al.*, 2012). Taken together, these examples point toward a diversity of situations that could have led to the evolution of cryptic species in New Caledonia such as differences in substrate type and disjunctions between areas with the same type of substrate, all of which may have contributed to this process. It may be that a significant portion of the plant diversity of New Caledonia has long been hidden and remains to be discovered.

#### ACKNOWLEDGEMENTS

The first author is very grateful to Arne Anderberg for his continued support of ongoing Sapotaceae research. We thank Laure Barrabé, Jean-François Butaud, Jacqueline Fambart-Tinel and Gildas Gâteblé for kindly providing fresh plant material from New Caledonia and the NOU herbarium team for various help. Irène and Daniel Létocart are thanked for their hospitality in Tchamba, New Caledonia. Thanks to New Caledonia North and South Provinces for collecting permits. Funds from Regnells Botaniska Gävomedel (Royal Swedish Academy of Sciences) supported fieldwork in New Caledonia.

#### REFERENCES

- Alström P, Saitoh T, Williams D, Nishiumi I, Shigeta Y, Ueda K, Irestedt M, Björklund M, Olsson U. 2011. The Arctic warbler *Phylloscopus borealis* – three anciently separated cryptic species revealed. *Ibis* **153**: 395–410.

- Álvarez I, Wendel JF. 2003.** Ribosomal ITS sequences and plant phylogenetic inference. *Molecular Phylogenetics and Evolution* **29**: 417–434.
- Aubréville A. 1967.** *Flore de la Nouvelle-Calédonie et dépendances. 1. Sapotacées*. Paris: Muséum National d'Histoire Naturelle.
- Backlund A, Bremer K. 1998.** To be or not to be – principles of classification and monotypic plant families. *Taxon* **47**: 391–400.
- Barrabé L, Maggia L, Pillon Y, Rigault F, Mouly A, Davis AP, Buerki S. 2014.** New Caledonian lineages of *Psychotria* (Rubiaceae) reveal different evolutionary histories and the largest documented plant radiation for the archipelago. *Molecular Phylogenetics and Evolution* **71**: 15–35.
- Bartish IV, Swenson U, Munzinger J, Anderberg AA. 2005.** Phylogenetic relationships among New Caledonian Sapotaceae (Ericales): molecular evidence for generic polyphyly and repeated dispersal. *American Journal of Botany* **92**: 667–673.
- Bickford D, Lohman DJ, Sodhi NS, Ng PKL, Meire R, Winker K, Ingram KK, Das I. 2007.** Cryptic species as a window on diversity and conservation. *Trends in Ecology and Evolution* **22**: 148–155.
- Cluzel D, Aitchison JC, Picard C. 2001.** Tectonic accretion and underplating of mafic terranes in the Late Eocene intraoceanic fore-arc of New Caledonia (Southwest Pacific): geodynamic implications. *Tectonophysics* **340**: 23–59.
- Cluzel D, Jourdan F, Meffre S, Maurizot P, Lesimple S. 2012.** The metamorphic sole of New Caledonia ophiolite:  $^{40}\text{Ar}/^{39}\text{Ar}$ , U–Pb, and geochemical evidence for subduction inception at a spreading ridge. *Tectonics* **31**: TC3016.
- Cruaud A, Jabbour-Zahab R, Genson G, Ungricht S, Rasplus JY. 2012.** Testing the emergence of New Caledonia: fig wasp mutualism as a case study and a review of evidence. *PLoS ONE* **7**: e30941.
- Drummond A, Suchard MA, Xie D, Rambaut A. 2012.** Bayesian phylogenetics with BEAUTi and the BEAST 1.7. *Molecular Biology and Evolution* **29**: 1969–1973.
- Espeland M, Murienne J. 2011.** Diversity dynamics in New Caledonia: towards the end of the museum model? *BMC Evolutionary Biology* **11**: 254.
- Farris JS, Albert VA, Källersjö M, Lipscomb D, Kluge AG. 1996.** Parsimony jackknifing outperforms neighbour-joining. *Cladistics* **12**: 99–124.
- Gaston KJ, Blackburn TM. 1996.** The tropics as a museum of biological diversity: an analysis of the New World avifauna. *Proceedings of the Royal Society London B* **263**: 63–68.
- Gautier L, Naciri Y, Anderberg AA, Smedmark JEE, Randrianaivo R, Swenson U. 2013.** A new species, genus and tribe of Sapotaceae, endemic to Madagascar. *Taxon* **62**: 972–983.
- Gernhard T. 2008.** The conditioned reconstructed process. *Journal of Theoretical Biology* **253**: 769–778.
- Govaerts R, Frodin DG, Pennington TD. 2001.** *World checklist and bibliography of Sapotaceae*. Kew: Royal Botanic Gardens.
- Grandcolas P, Murienne J, Robillard T, Desutter-Grandcolas L, Jourdan H, Guilbert E, Deharveng L. 2008.** New Caledonia: a very old Darwinian island? *Philosophical Transactions of the Royal Society B* **363**: 3309–3317.
- Hall R. 2002.** Cenozoic geological and plate tectonic evolution of SA Asia and the SW Pacific: computer-based reconstructions, model and animations. *Journal of Asian Earth Sciences* **20**: 353–431.
- Hamilton MB. 1999.** Four primer pairs for the amplification of chloroplastic intragenic regions with intraspecific variation. *Molecular Ecology* **8**: 521–523.
- Harris GJ, Harris MW. 1997.** *Plant identification terminology: an illustrated glossary, 1st edn*. 5th printing. Springer Lake: Springer Lake Publishing.
- Heads M. 2008.** Panbiogeography of New Caledonia, southwest Pacific: basal angiosperms on basement terranes, ultramafic endemics inherited from volcanic island arcs and old taxa endemic to young islands. *Journal of Biogeography* **35**: 2153–2175.
- Heads M. 2010.** Biogeographical affinities of the New Caledonian biota: a puzzle with 24 pieces. *Journal of Biogeography* **37**: 1179–1201.
- Ibanez T, Munzinger J, Dagostini G, Hequet V, Rigault F, Jaffré T, Birnbaum P. 2014.** Structural and floristic characteristics of mixed rainforest in New Caledonia: new data from the New Caledonian Plant Inventory and Permanent Plot Network (NC-PIPPN). *Applied Vegetation Science* **17**: 386–397.
- Jaffré T. 2005.** Conservation programmes in New Caledonia, western Pacific: in place for the dry forest, but urgently needed for the ultramafic vegetation. *Journal of Botanic Gardens Conservation International* **2**: 13.
- Jaffré T, Bouchet P, Veillon JM. 1998.** Threatened plants of New Caledonia: is the system of protected areas adequate? *Biodiversity and Conservation* **7**: 109–135.
- James SW, Porco D, Decaëns T, Richard B, Rougerie R, Erséus C. 2010.** DNA barcoding reveals cryptic diversity in *Lumbricus terrestris* L., 1758 (Clitellata): resurrection of *L. herculeus* (Savigny, 1826). *PLoS ONE* **5**: e15629.
- Lemey P, Rambaut A, Drummond AJ, Suchard MA. 2009.** Bayesian phylogeography finds its root. *PLoS Computational Biology* **9**: e1000520.
- Lowry II PP, Munzinger J, Bouchet P, Géraux H, Bauer A, Langrand O, Mittermeier RA. 2004.** *New Caledonia*. In: Mittermeier RA, Robles Gil P, Hoffmann M, Pilgrim J, Brooks T, Mittermeier CG, Lamoreux JL, da Fonseca GAB, eds. *Hotspots revisited: earth's biologically richest and most threatened terrestrial ecoregions*. Mexico City: CEMEX, 193–197.
- McLoughlin S. 2001.** The breakup history of Gondwana and its impact on pre-Cenozoic floristic provincialism. *Australian Journal of Botany* **49**: 271–300.
- Méndez M, Munzinger M. 2010.** *Planchonella*, first record of gynomonoecey for the family Sapotaceae. *Plant Systematics and Evolution* **287**: 65–73.
- Morat P, Jaffré T, Tronchet F, Munzinger J, Pillon Y, Veillon JM, Chalopin M. 2012.** Le référentiel taxonom-



- ique floral et les caractéristiques de la flore vasculaire indigène de la Nouvelle-Calédonie. *Adansonia, sér.* **3**: 179–221.
- Myers N, Mittermeier RA, Mittermeier CG, da Fonseca GAB, Kent J. 2000.** Biodiversity hotspots for conservation priorities. *Nature* **403**: 853–858.
- Neall VE, Trewick SA. 2008.** The age and origin of the Pacific islands: a geological overview. *Philosophical Transactions of the Royal Society B* **363**: 3293–3308.
- Nee S, Holmes EC, Rambaut A, Harvey PH. 1995.** Inferring population history from molecular phylogenies. *Philosophical Transactions of the Royal Society B* **349**: 25–31.
- Nielsen SV, Bauer AM, Jackman TR, Hitchmough RA, Daugherty CH. 2011.** New Zealand geckos (Diplodactylidae): cryptic diversity in a post-Gondwanan lineage with trans-Tasman affinities. *Molecular Phylogenetics and Evolution* **59**: 1–22.
- Oxelman B, Bremer B. 2000.** Discovery of paralogous nuclear gene sequences coding for the second-largest subunit of RNA polymerase II (*RPB2*) and their phylogenetic utility in Gentianales of the asterids. *Molecular Biology and Evolution* **17**: 1131–1145.
- Paris JP. 1981.** *Géologie de la Nouvelle-Calédonie: un essai de synthèse*. Orléans: Editions du B.R.G.M.
- Pascal M, de Forges BR, le Guyader H, Simberloff D. 2008.** Mining and other threats to the New Caledonia biodiversity hotspot. *Conservation Biology* **22**: 498–499.
- Pelletier B. 2006.** Geology of the New Caledonia region and its implications for the study of the New Caledonian biodiversity. In: Payri CE, Richer de Forges B, eds. *Compendium of marine species from New Caledonia*. Nouméa: Centre IRD de Nouméa, 17–30.
- Pennington TD. 1991.** *The genera of Sapotaceae*. Kew: Royal Botanic Gardens.
- Pillon Y. 2012.** Time and tempo of diversification in the flora of New Caledonia. *Botanical Journal of the Linnean Society* **170**: 288–298.
- Pillon Y, Hopkins HCF, Munzinger J, Amir H, Chase MW. 2009.** Cryptic species, gene recombination and hybridization in the genus *Spiraeanthemum* (Cunoniaceae) from New Caledonia. *Botanical Journal of the Linnean Society* **161**: 137–152.
- Poczai P, Hyvönen J. 2010.** Nuclear ribosomal spacer regions in plant phylogenetics: problems and prospects. *Molecular Biology Reports* **37**: 1897–1912.
- Posada D. 2008.** jModelTest: phylogenetic model averaging. *Molecular Biology and Evolution* **25**: 1253–1256.
- Posada D, Buckley TR. 2004.** Model selection and model averaging in phylogenetics: advantages of Akaike information criterion and Bayesian approaches over likelihood ratio tests. *Systematic Biology* **53**: 793–808.
- R Core Team. 2014.** *R: a language and environment for statistical computing*. Vienna: R Foundation for Statistical Computing, available at: <http://www.R-project.org/> (last accessed December 2014).
- Rabotsky DL. 2006.** LASER: a maximum likelihood toolkit for detecting temporal shifts in diversification rates from molecular phylogenies. *Evolutionary Bioinformatics* **2**: 247–250.
- Rambaut A. 2009.** FigTree v1.3.1. Available at: <http://tree.bio.ed.ac.uk/software/figtree/> (last accessed September 2014).
- Rambaut A, Drummond AJ. 2009.** Tracer v1.5. Available at: <http://tree.bio.ed.ac.uk/software/tracer/> (last accessed September 2014).
- Rannala B, Yang Z. 1996.** Probability distribution of molecular evolutionary trees: a new method of phylogenetic inference. *Journal of Molecular Evolution* **43**: 304–311.
- Raven PH, Axelrod DI. 1972.** Plate tectonics and Australasian paleobiogeography. *Science* **176**: 1379–1386.
- Schwartz GE. 1978.** Estimating the dimension of a model. *The Annals of Statistics* **6**: 461–464.
- Simmons MP, Ochoterena H. 2000.** Gaps as characters in sequence-based phylogenetic analyses. *Systematic Biology* **49**: 369–381.
- Stebbins GL. 1950.** *Variation and evolution in plants*. New York: Columbia University Press.
- Stuessy TF, Crawford DJ, Marticorena C. 1990.** Patterns of phylogeny in the endemic vascular flora of the Juan Fernandez Islands, Chile. *Systematic Botany* **15**: 338–346.
- Stuessy TF, Jakubowsky G, Gómez RS, Pfosser M, Schlüter PM, Fer T, Sun BY, Kato H. 2006.** Anagenetic evolution in island plants. *Journal of Biogeography* **33**: 1259–1265.
- Swenson U, Anderberg AA. 2005.** Phylogeny, character evolution, and classification of Sapotaceae (Ericales). *Cladistics* **21**: 101–130.
- Swenson U, Bartish IV, Munzinger J. 2007a.** Phylogeny, diagnostic characters, and generic limitation of Australasian Chrysophylloideae (Sapotaceae, Ericales): evidence from ITS sequence data and morphology. *Cladistics* **23**: 201–228.
- Swenson U, Munzinger J. 2009.** Revision of *Pycnandra* subgenus *Pycnandra* (Sapotaceae), a genus endemic to New Caledonia. *Australian Systematic Botany* **22**: 437–465.
- Swenson U, Munzinger J. 2010a.** Revision of *Pycnandra* subgenus *Achradotypus* (Sapotaceae), with five new species from New Caledonia. *Australian Systematic Botany* **23**: 185–216.
- Swenson U, Munzinger J. 2010b.** Taxonomic revision of *Pycnandra* subgenus *Trouettia* (Sapotaceae), with six new species from New Caledonia. *Australian Systematic Botany* **23**: 333–370.
- Swenson U, Munzinger J. 2010c.** Revision of *Pycnandra* subgenus *Sebertia* (Sapotaceae) and a generic key to the family in New Caledonia. *Adansonia, sér.* **3**: 239–249.
- Swenson U, Munzinger J, Bartish IV. 2007b.** Molecular phylogeny of *Planchonella* (Sapotaceae) and eight new species from New Caledonia. *Taxon* **56**: 329–354.
- Swenson U, Nylinder S, Munzinger J. 2013.** Towards a natural classification of Sapotaceae subfamily Chrysophylloideae in Oceania and Southeast Asia based on nuclear sequence data. *Taxon* **62**: 746–770.

- Swenson U, Nylinder S, Munzinger J. 2014.** Sapotaceae biogeography supports New Caledonia being an old Darwinian island. *Journal of Biogeography* **41**: 797–809.
- Swenson U, Richardson JE, Bartish IV. 2008b.** Multi-gene phylogeny of the pantropical subfamily Chrysophylloideae (Sapotaceae): evidence of generic polyphyly and extensive morphological homoplasy. *Cladistics* **24**: 1006–1031.
- Swenson U, Lowry II PP, Munzinger J, Rydin C, Bartish IV. 2008a.** Phylogeny and generic limits in the *Niemeyera* complex of New Caledonian Sapotaceae: evidence of multiple origins of the anisomerous flower. *Molecular Phylogenetics and Evolution* **49**: 909–929.
- Swofford DL. 2002.** *PAUP\*: phylogenetic analysis using parsimony (\*and other methods), ver. 4.0b10*. Sunderland, MA: Sinauer.
- Terra-Araujo MH, de Faria AD, Ribeiro JEL, Swenson U. 2012.** Flower biology and subspecies concept in *Micropoholis guyanensis* (Sapotaceae): evidence of ephemeral flowers in the family. *Australian Systematic Botany* **25**: 295–303.
- Turner B, Munzinger J, Duangjai S, Tensch EM, Stockenhuber R, Barfuss MHJ, Chase MW, Samuel R. 2013b.** Molecular phylogenetics of New Caledonian *Diospyros* (Ebenaceae) using plastid and nuclear markers. *Molecular Phylogenetics and Evolution* **69**: 740–763.
- Turner B, Paun O, Munzinger J, Duangjai S, Chase MW, Samuel R. 2013a.** Analyses of amplified fragment length polymorphisms (AFLP) indicate rapid radiation of *Diospyros* species (Ebenaceae) endemic to New Caledonia. *BMC Evolutionary Biology* **13**: 269.
- Vink W. 1958.** Revision of the Sapotaceae of the Malaysian area in a wider sense. XIII. *Chrysophyllum* L. *Blumea* **9**: 21–74.
- Yang Z, Rannala B. 1997.** Bayesian phylogenetic inference using DNA sequences: a Markov chain Monte Carlo method. *Molecular Biology and Evolution* **14**: 717–724.

## SUPPORTING INFORMATION

Additional Supporting Information may be found in the online version of this article at the publisher's web-site:

**Appendix S1.** Aligned data matrix.

## APPENDIX

Voucher information in the following order: taxon name with authority, country or island of New Caledonia (sometimes with locality), collector(s), collector number, (herbarium abbreviation), and European Nucleotide Archive/GenBank accessions (ETS, ITS, RPB2, *trnH-psbA*). Species not yet described are indicated by collector and number. The 174 sequences published here have the prefix LN.

| Taxon                                                   | Area (locality)            | Voucher                               | ETS      | ITS      | RPB2     | <i>trnH-psbA</i> |
|---------------------------------------------------------|----------------------------|---------------------------------------|----------|----------|----------|------------------|
| <i>Amorphospermum antilogum</i> F.Muell.                | Australia                  | Bartish & Jessup 4 (S)                | HE860156 | DQ154055 | HE995662 | DQ344119         |
| <i>Chrysophyllum wagapense</i> Guillaumin               | Grande Terre               | Munzinger et al. 5634 (NOU, P, S)     | HE860151 | HE860077 | HE995601 | LN809210         |
| <i>Leptostylis filipes</i> Benth.                       | Grande Terre, Koumac       | Webster & Hildreth 14665 (P)          | EU661382 | AY552135 | HE995603 | DQ344113         |
| <i>Leptostylis filipes</i> Benth.                       | Grande Terre, Poum         | Munzinger et al. 4695 (NOU, P, S)     | LN809080 | LN809121 | LN809162 | LN809211         |
| <i>Leptostylis filipes</i> Benth.                       | Grande Terre, Vavouto      | Munzinger et al. 2365 (NOU, P, S)     | LN809081 | LN809122 | LN809163 | LN809212         |
| <i>Leptostylis goroensis</i> Aubrév.                    | Grande Terre               | Munzinger 2288 (NOU, P, S)            | EU661383 | DQ154052 | HE995604 | EU661501         |
| <i>Leptostylis grandifolia</i> Vink                     | Grande Terre               | Munzinger & Oddi 2121 (MO, NOU, P, S) | EU661384 | DQ154053 | HE995605 | EU661502         |
| <i>Leptostylis multiflora</i> Vink                      | Grande Terre, Koumac       | Munzinger 6692 (NOU)                  | LN809082 | LN809123 | LN809164 | LN809213         |
| <i>Leptostylis multiflora</i> Vink                      | Grande Terre, Koumac       | Munzinger 6744 (NOU)                  | LN809083 | LN809124 | LN809165 | LN809214         |
| <i>Leptostylis petiolata</i> Vink                       | Grande Terre               | Swenson & Munzinger 714 (NOU, S)      | EU661385 | LN809125 | LN809166 | LN809215         |
| <i>Niemeyera chartacea</i> (F.M.Bailey) C.T.White       | Australia                  | Bartish & Jessup 5 (S)                | HE860157 | DQ154057 | HE995606 | EU661506         |
| <i>Niemeyera Ford2429</i>                               | Australia                  | Andrew Ford 2429 (S)                  | EU661389 | EF025089 | HE995607 | EU661508         |
| <i>Niemeyera prunifera</i> (F.Muell.) F.Muell.          | Australia                  | Jessup 5238 (S)                       | HE860158 | DQ154058 | HE995608 | DQ344120         |
| <i>Niemeyera whitei</i> (Aubrév.) L.W.Jessup            | Australia                  | Floyd s.n. (S)                        | EU661388 | AY552137 | HE995609 | EU661507         |
| <i>Pycnantra acuminata</i> (Baill.) Swenson & Munzinger | Grande Terre, Boulinda     | Swenson & Munzinger 1114 (NOU, S)     | LN809084 | LN809126 | LN809167 | LN809216         |
| <i>Pycnantra acuminata</i> (Baill.) Swenson & Munzinger | Grande Terre, Creek Pernod | Munzinger et al. 5761 (NOU, S)        | LN809085 | LN809127 | LN809168 | LN809217         |
| <i>Pycnantra acuminata</i> (Baill.) Swenson & Munzinger | Grande Terre, Port Bouquet | Munzinger 1006 (MO, NOU, P)           | EU661430 | AY552124 | HE995631 | EU661544         |

Appendix *Continued*

| Taxon                                                                               | Area (locality)            | Voucher                                      | ETS      | ITS      | <i>RPB2</i> | <i>trnH-psbA</i> |
|-------------------------------------------------------------------------------------|----------------------------|----------------------------------------------|----------|----------|-------------|------------------|
| <i>Pycnandra acuminata</i> (Baill.)<br>Swenson & Munzinger                          | Grande Terre, Tiébaghi     | Swenson <i>et al.</i> 924 (NOU, P, S)        | LN809086 | LN809128 | LN809169    | LN809218         |
| <i>Pycnandra atrofusca</i> Swenson & Munzinger                                      | Grande Terre, Boulinda     | Munzinger <i>al.</i> 4968 (NOU, P, S)        | LN809087 | LN809129 | LN809170    | LN809219         |
| <i>Pycnandra atrofusca</i> Swenson & Munzinger                                      | Grande Terre, Forêt Nord   | Munzinger <i>et al.</i> 2618 (NOU, P, S)     | EU661419 | EU661443 | HE995632    | EU661533         |
| <i>Pycnandra balansae</i> (Baill.)<br>Swenson & Munzinger                           | Grande Terre, Col Amieu    | Barrabé <i>et al.</i> 275 (NOU, P, S)        | LN809088 | LN809130 | LN809171    | LN809220         |
| <i>Pycnandra balansae</i> (Baill.)<br>Swenson & Munzinger                           | Grande Terre, Forêt Faux   | MacKee 37668 (NOU)                           | LN809089 | LN809131 | LN809172    | LN809221         |
| <i>Pycnandra balansae</i> (Baill.)<br>Swenson & Munzinger                           | Grande Terre, Tchamba      | Munzinger <i>et al.</i> 1451 (MO, NOU, P, S) | EU661387 | AY552123 | HE995754    | EU661505         |
| <i>Pycnandra belepensis</i><br>Swenson & Munzinger                                  | Art Island                 | Swenson, Munzinger & Barrabé 913 (S)         | HE860243 | HE860123 | HE995687    | LN809222         |
| <i>Pycnandra benthamii</i> Baill.                                                   | Grande Terre               | Munzinger <i>et al.</i> 2228 (NOU, P, S)     | EU661404 | EU661436 | HE995633    | EU661519         |
| <i>Pycnandra blaffartii</i> Swenson & Munzinger                                     | Grande Terre               | Swenson <i>et al.</i> 597 (NOU, S)           | EU661423 | AY552127 | HE995634    | EU661537         |
| <i>Pycnandra blanchonii</i> (Aubrév.) Swenson & Munzinger                           | Grande Terre               | Munzinger <i>et al.</i> 2576 (NOU, S)        | EU661390 | DQ154059 | HE995635    | EU661509         |
| <i>Pycnandra bourailensis</i><br>Swenson & Munzinger                                | Grande Terre               | Munzinger <i>et al.</i> 2963 (K, MO, NOU, S) | EU661428 | EU661450 | LN809173    | EU661542         |
| <i>Pycnandra bracteolata</i><br>Swenson & Munzinger                                 | Grande Terre               | Munzinger, Pillon & Butin 2885 (NOU, S)      | EU661421 | EU661445 | HE995636    | EU661535         |
| <i>Pycnandra caeruleilatex</i><br>Swenson & Munzinger                               | Grande Terre, Forêt Nord   | Munzinger <i>et al.</i> 2622 (MO, NOU, P, S) | EU661426 | EU661448 | HE995637    | EU661540         |
| <i>Pycnandra caeruleilatex</i><br>Swenson & Munzinger                               | Grande Terre, Kuébini      | Munzinger & Beauvallet 6001 (NOU, S)         | LN809090 | LN809132 | LN809174    | LN809224         |
| <i>Pycnandra canaliculata</i><br>Swenson & Munzinger                                | Grande Terre               | Munzinger <i>et al.</i> 2067 (MO, NOU, P, S) | EU661431 | DQ154092 | HE995638    | EU661545         |
| <i>Pycnandra carinocostata</i> Vink                                                 | Grande Terre               | McPherson & Munzinger 18091 (NOU, S)         | EU661405 | AY552132 | HE995639    | EU661520         |
| <i>Pycnandra chartacea</i> Vink                                                     | Grande Terre               | Munzinger & Swenson 3059 (NOU, P, S)         | EU661406 | EU661437 | LN809175    | EU661521         |
| <i>Pycnandra comptonii</i> (S.Moore) Vink                                           | Grande Terre               | Lowry <i>et al.</i> 5780A (MO, NOU, S)       | EU661407 | AY552131 | HE995640    | DQ344145         |
| <i>Pycnandra confusa</i> Swenson & Munzinger                                        | Grande Terre               | Munzinger & Beauvallet 5629 (NOU, S)         | LN809091 | LN809133 | —           | LN809225         |
| <i>Pycnandra controversa</i> (Guillaumin) Vink                                      | Grande Terre               | Lowry <i>et al.</i> 5787 (MO, NOU, P, S)     | EU661408 | AY552126 | HE995641    | EU661522         |
| <i>Pycnandra cylindricarpa</i><br>Swenson & Munzinger                               | Grande Terre               | Swenson <i>et al.</i> 615 (NOU, S)           | EU661429 | AY552110 | HE995757    | EU661543         |
| <i>Pycnandra decandra</i> (Montrouz.) Vink                                          | Art Island                 | Swenson, Munzinger & Barrabé 920 (S)         | HE860244 | HE860124 | HE995688    | LN809226         |
| <i>Pycnandra decandra</i> ssp. <i>coriacea</i> (Baill.)<br>Swenson & Munzinger      | Rivière des Lacs           | Munzinger <i>et al.</i> 2031 (MO, NOU, P, S) | EU661409 | DQ154091 | LN809176    | EU661523         |
| <i>Pycnandra decandra</i> ssp. <i>coriacea</i> (Baill.)<br>Swenson & Munzinger      | Tia                        | Swenson <i>et al.</i> 700b (NOU, S)          | EU661413 | EU661439 | LN809177    | EU661527         |
| <i>Pycnandra deplanchei</i> (Baill.)<br>Swenson & Munzinger                         | Grande Terre, Port Bouquet | Munzinger 978 (MO, NOU, P, S)                | EU661380 | AY552120 | HE995642    | EU661499         |
| <i>Pycnandra deplanchei</i> (Baill.)<br>Swenson & Munzinger                         | Grande Terre, Mt. Kokoréta | Cochereau <i>s.n.</i> (NOU)                  | EU661380 | AY552119 | LN809178    | EU661499         |
| <i>Pycnandra deplanchei</i> ssp. <i>floribunda</i> (S.Moore)<br>Swenson & Munzinger | Grande Terre               | Munzinger 2199 (NOU, P, S)                   | LN809092 | DQ154050 | LN809179    | LN809227         |
| <i>Pycnandra elliptica</i> Swenson & Munzinger                                      | Grande Terre               | Munzinger 5631 (NOU, S)                      | LN809093 | LN809134 | LN809180    | LN809228         |
| <i>Pycnandra fastuosa</i> (Baill.)<br>Vink                                          | Grande Terre, Forêt Nord   | Munzinger & Swenson 2993 (NOU, S)            | EU661394 | EU661434 | HE995643    | EU661512         |
| <i>Pycnandra fastuosa</i> (Baill.)<br>Vink                                          | Grande Terre, Haute Ni     | Munzinger <i>et al.</i> 2027 (NOU, P, S)     | EU661412 | EU661438 | —           | EU661526         |
| <i>Pycnandra fastuosa</i> (Baill.)<br>Vink                                          | Grande Terre, Kouakoué     | Munzinger <i>et al.</i> 1694 (MO, NOU, P, S) | EU661411 | AY552121 | —           | EU661525         |
| <i>Pycnandra fastuosa</i> (Baill.)<br>Vink                                          | Grande Terre, Pernod       | Munzinger <i>et al.</i> 5763 (NOU, S)        | LN809095 | LN809136 | —           | LN809230         |
| <i>Pycnandra fastuosa</i> (Baill.)<br>Vink                                          | Grande Terre, Prony        | Munzinger 6004 (NOU)                         | LN809094 | LN809135 | LN809181    | LN809229         |

Appendix *Continued*

| Taxon                                                                     | Area (locality)          | Voucher                                                    | ETS      | ITS      | <i>RPB2</i> | <i>trnH-psbA</i> |
|---------------------------------------------------------------------------|--------------------------|------------------------------------------------------------|----------|----------|-------------|------------------|
| <i>Pycnandra fastuosa</i> (Baill.)<br>Vink                                | Grande Terre, Pwénari    | <i>Munzinger et al. 1281</i> (MO,<br>NOU, P)               | EU661410 | AY552122 | LN809182    | EU661524         |
| <i>Pycnandra francii</i><br>(Guillaumin & Dubard)<br>Swenson & Munzinger  | Grande Terre             | <i>Munzinger 965</i> (MO, NOU, P)                          | EU661391 | AY552117 | HE995644    | DQ344121         |
| <i>Pycnandra glabella</i> Swenson<br>& Munzinger                          | Grande Terre             | <i>Munzinger et al. 2615</i> (NOU,<br>P, S)                | EU661418 | EU661442 | HE995645    | EU661532         |
| <i>Pycnandra glaberrima</i><br>Swenson & Munzinger                        | Grande Terre             | <i>Munzinger et al. 1394</i> (MO,<br>NOU, P, S)            | EU661399 | AY552133 | HE995646    | EU661517         |
| <i>Pycnandra gordoniiifolia</i><br>(S.Moore) Swenson &<br>Munzinger       | Grande Terre, Bopope     | <i>Swenson &amp; Munzinger 726a</i><br>(NOU, P, S)         | EU661392 | EU661433 | HE995647    | EU661510         |
| <i>Pycnandra gordoniiifolia</i><br>(S.Moore) Swenson &<br>Munzinger       | Grande Terre, Captage    | <i>Swenson &amp; Munzinger 1130</i><br>(NOU, P, S)         | LN809096 | LN809137 | LN809183    | LN809231         |
| <i>Pycnandra gordoniiifolia</i><br>(S.Moore) Swenson &<br>Munzinger       | Grande Terre, Forêt Nord | <i>Munzinger &amp; Swenson 2997</i><br>(NOU, P, S)         | LN809097 | LN809138 | LN809184    | LN809232         |
| <i>Pycnandra gordoniiifolia</i><br>(S.Moore) Swenson &<br>Munzinger       | Grande Terre, Nato Hill  | <i>Swenson &amp; Munzinger 1135</i><br>(NOU, P, S)         | LN809098 | LN809139 | LN809185    | LN809233         |
| <i>Pycnandra griseosepala</i> Vink                                        | Grande Terre             | <i>Swenson, McPherson &amp;<br/>Mouly 627</i> (MO, NOU, S) | EU661414 | AY552128 | HE995648    | EU661528         |
| <i>Pycnandra heteromera</i> (Vink)<br>Swenson & Munzinger                 | Grande Terre             | <i>Munzinger et al. 2798</i> (NOU,<br>P, S)                | LN809099 | LN809140 | LN809186    | LN809234         |
| <i>Pycnandra intermedia</i> (Baill.)<br>Swenson & Munzinger               | Grande Terre             | <i>Munzinger &amp; Dagostini 2631</i><br>(NOU, P, S)       | LN809100 | LN809141 | LN809187    | LN809235         |
| <i>Pycnandra kaalaensis</i> Aubrév.                                       | Grande Terre, Boulinda   | <i>Munzinger et al. 4990</i> (NOU,<br>P, S)                | LN809101 | LN809142 | LN809188    | LN809236         |
| <i>Pycnandra kaalaensis</i> Aubrév.                                       | Grande Terre, Koniambo   | <i>Munzinger &amp; Labat 2599</i><br>(NOU, S)              | EU661415 | EU661440 | HE995756    | EU661529         |
| <i>Pycnandra kaalaensis</i> Aubrév.                                       | Grande Terre, Koumac     | <i>Swenson &amp; Munzinger 928</i><br>(NOU, S)             | LN809102 | LN809143 | LN809189    | LN809237         |
| <i>Pycnandra linearifolia</i><br>Swenson & Munzinger                      | Grande Terre             | <i>Munzinger &amp; Blaffart 2786</i><br>(NOU, P, S)        | EU661427 | EU661449 | HE995753    | EU661541         |
| <i>Pycnandra lissophylla</i> (Pierre<br>ex Baill.) Swenson &<br>Munzinger | Grande Terre, Goro       | <i>Munzinger et al. 2103</i> (MO,<br>NOU, P, S)            | LN809103 | LN809144 | LN809190    | LN809238         |
| <i>Pycnandra lissophylla</i> (Pierre<br>ex Baill.) Swenson &<br>Munzinger | Grande Terre, Yaté       | <i>Munzinger &amp; Beauvallet 6003</i><br>(NOU, S)         | LN809104 | LN809145 | LN809191    | LN809239         |
| <i>Pycnandra litseiflora</i><br>(Guillaumin) Swenson &<br>Munzinger       | Grande Terre             | <i>MacKee 16651 &amp; 17085</i> (S)                        | —        | DQ154060 | —           | EU661510         |
| <i>Pycnandra longipetiolata</i><br>Swenson & Munzinger                    | Grande Terre             | <i>Fambart-Tinel 181</i> (NOU)                             | LN809105 | LN809146 | LN809192    | LN809240         |
| <i>Pycnandra neocaledonica</i><br>(S.Moore) Vink                          | Grande Terre             | <i>Tronchet et al. 426</i> (MO,<br>NOU, P, S)              | EU661416 | AY552129 | HE995649    | EU661530         |
| <i>Pycnandra obscurinerva</i><br>(Vink) Swenson &<br>Munzinger            | Grande Terre, Kopéto     | <i>Swenson &amp; Munzinger 931</i><br>(NOU, P, S)          | LN809106 | LN809147 | LN809193    | LN809247         |
| <i>Pycnandra obscurinerva</i><br>(Vink) Swenson &<br>Munzinger            | Grande Terre, Taom       | <i>Munzinger 3548</i> (NOU)                                | LN809107 | LN809148 | LN809194    | LN809248         |
| <i>Pycnandra obscurinerva</i><br>(Vink) Swenson &<br>Munzinger            | Grande Terre, Tia        | <i>Swenson et al. 701</i> (BRI, MO,<br>NOU, P, S)          | LN809108 | LN809149 | LN809195    | LN809249         |
| <i>Pycnandra obscurinerva</i><br>(Vink) Swenson &<br>Munzinger            | Grande Terre, Tiébaghi   | <i>Munzinger 1913</i> (NOU)                                | EU661432 | DQ154095 | LN809196    | EU661546         |
| <i>Pycnandra ouaiemensis</i><br>Swenson & Munzinger                       | Grande Terre             | <i>Munzinger et al. 3135</i> (NOU,<br>P, S)                | EU661422 | EU661446 | HE995689    | EU661536         |
| <i>Pycnandra paucinervia</i><br>Swenson & Munzinger                       | Grande Terre             | <i>Munzinger et al. 1438</i> (NOU,<br>P, S)                | EU661424 | AY552159 | HE995650    | EU661538         |
| <i>Pycnandra pubiflora</i> Swenson<br>& Munzinger                         | Grande Terre             | <i>Munzinger et al. 2624</i> (NOU,<br>P, S)                | EU661420 | EU661444 | HE995651    | EU661534         |
| <i>Pycnandra sarlinii</i> (Aubrév.)<br>Swenson & Munzinger                | Grande Terre             | <i>Munzinger 1860</i> (NOU, P, S)                          | EU661395 | EU661435 | HE995652    | EU661513         |

Appendix *Continued*

| Taxon                                                                      | Area (locality)             | Voucher                                                 | ETS      | ITS      | <i>RPB2</i> | <i>trnH-psbA</i> |
|----------------------------------------------------------------------------|-----------------------------|---------------------------------------------------------|----------|----------|-------------|------------------|
| <i>Pycnandra schmidii</i> (Aubrév.)<br>Swenson & Munzinger                 | Grande Terre                | <i>McPherson &amp; Munzinger</i><br>18106 (NOU, S)      | EU661396 | AY552116 | HE995653    | EU661514         |
| <i>Pycnandra sessiliflora</i><br>Swenson & Munzinger                       | Grande Terre, Forêt Nord    | <i>Munzinger 2608</i> (NOU, S)                          | LN809109 | LN809150 | LN809197    | LN809250         |
| <i>Pycnandra sessiliflora</i><br>Swenson & Munzinger                       | Grande Terre, Tchingou      | <i>Munzinger &amp; McPherson 696</i><br>(NOU, S)        | EU661398 | AY552161 | HE995691    | EU661516         |
| <i>Pycnandra sessilifolia</i><br>(Pancher & Sebert)<br>Swenson & Munzinger | Grande Terre, Kouakoué      | <i>Munzinger et al. 2025</i> (MO,<br>NOU, P, S)         | LN809110 | LN809151 | LN809198    | LN809251         |
| <i>Pycnandra sessilifolia</i><br>(Pancher & Sebert)<br>Swenson & Munzinger | Grande Terre, Tchingou      | <i>McPherson &amp; Munzinger</i><br>18176 (MO, P)       | EU661397 | AY552118 | HE995654    | EU661515         |
| <i>Pycnandra vieillardii</i> (Baill.)<br>Vink                              | Grande Terre                | <i>Dumontet, Zongo &amp; Maituku</i><br><i>s.n.</i> (S) | EU661417 | EU661441 | HE995655    | EU661531         |
| <i>Pycnandra viridiflora</i><br>Swenson & Munzinger                        | Grande Terre                | <i>Munzinger et al. 4195</i> (NOU,<br>P, S)             | HE860245 | HE860125 | HE995656    | LN809255         |
| <i>Pycnandra</i> Butaud 3343                                               | Ouvéa                       | <i>Butaud 3343</i> (S)                                  | LN809111 | LN809152 | LN809199    | LN809223         |
| <i>Pycnandra</i> Munzinger 1717                                            | Grande Terre                | <i>Munzinger et al. 1717</i> (MO,<br>NOU, P, S)         | EU661425 | EU661447 | LN809200    | EU661539         |
| <i>Pycnandra</i> Munzinger 3068                                            | Grande Terre                | <i>Munzinger et al. 3068</i> (IND,<br>NOU, P, S)        | LN809112 | LN809153 | LN809201    | LN809242         |
| <i>Pycnandra</i> Munzinger 3315                                            | Grande Terre                | <i>Munzinger 3315</i> (NOU)                             | LN809113 | LN809154 | —           | LN809243         |
| <i>Pycnandra</i> Munzinger 3385                                            | Grande Terre, Poum          | <i>Munzinger 3385</i> (S)                               | LN809115 | LN809155 | LN809202    | LN809244         |
| <i>Pycnandra</i> Munzinger 3385                                            | Grande Terre, Poum          | <i>Barrière 122</i> (NOU, P, S)                         | LN809114 | LN809156 | LN809203    | —                |
| <i>Pycnandra</i> Munzinger 5673                                            | Grande Terre                | <i>Munzinger et al. 5673</i> (S)                        | LN809116 | LN809157 | LN809204    | LN809245         |
| <i>Pycnandra</i> Munzinger 6089                                            | Grande Terre                | <i>Munzinger 6089</i> (NOU, P, S)                       | LN809117 | LN809158 | LN809205    | LN809246         |
| <i>Pycnandra</i> Swenson 1134                                              | Grande Terre                | <i>Swenson &amp; Munzinger 1134</i><br>(NOU, P, S)      | LN809118 | LN809159 | LN809206    | LN809252         |
| <i>Pycnandra</i> Veillon 8117                                              | Grande Terre, Ile Leprédour | <i>Veillon 7782</i> (NOU, P, S)                         | LN809119 | LN809160 | LN809207    | LN809254         |
| <i>Pycnandra</i> Veillon 8117                                              | Grande Terre, Pic de Tiaoué | <i>Fambart-Tinel 107</i> (NOU, S)                       | LN809120 | LN809161 | LN809209    | LN809253         |
| <i>Pycnandra</i> Veillon 8117                                              | Grande Terre, Pouembout     | <i>Veillon 8117</i> (NOU, P)                            | EU661386 | AY552136 | LN809208    | EU661504         |
